# Supplementary material for: FET fusion oncoproteins disrupt physiologic DNA repair networks and induce ATR synthetic lethality in cancer
Source: Research Square preprint supplement (doi:10.21203/rs.3.rs-2869150/v1), 2023-05-29
Supplement: Supplementary file 1 [file 99cf5aba78f0e25594ce1c87.xlsx]

## Sheet: Screen data
	DMSO (essential genes)			40 nM doxorubucin (LD97)			12.5 nM doxorubicin (LD20)
	Mann-Whitney p-value	avg. phenotype of strongest 3 guides		Mann-Whitney p-value	avg. phenotype of strongest 3 guides		Mann-Whitney p-value	avg. phenotype of strongest 3 guides
gene
A2M	0.440147	0.401823		0.663279	0.183569		0.777209	-0.214297
A4GALT	0.0604239	0.874564		0.600198	0.471241		0.0794816	1.37955
AACS	0.168198	-0.947721		0.0533829	0.44707		0.14025	0.204602
AADACL2	0.997186	-0.471991		0.316563	-0.7006		0.505197	-0.213753
AADAT	0.570175	-0.343669		0.0867106	-4.53278		0.137954	-0.698316
AAK1	0.0451801	-1.38473		0.407814	0.713902		0.467179	-0.245207
AANAT	0.745573	-0.671176		0.771861	0.217464		0.572625	-0.281593
AARS	0.95209	-0.613108		0.12088	-2.07983		0.749283	0.355335
AARS2	0.00452729	-3.23432		0.0967836	1.01248		0.19709	0.767698
AASS	0.0592298	-1.98041		0.0421933	-1.58586		0.209843	-0.241861
AATF	0.0128455	-4.2413		0.663969	-1.16148		0.430997	-0.511961
AATK	0.394522	-3.69541		0.747421	1.84718		0.25215	0.885075
ABAT	0.573185	0.56979		0.430344	-0.751423		0.0532173	-0.683424
ABCA1	0.883139	0.249709		0.267399	0.603997		0.304504	0.384613
ABCA13	0.212122	0.25051		0.743811	0.0607659		0.852476	-0.249444
ABCA3	0.895578	-0.595113		0.0215564	-2.07709		0.00406581	-1.01084
ABCA4	0.33229	0.371351		0.061582	-2.32951		0.293676	-0.289875
ABCA5	0.253829	-1.68484		0.137126	1.68719		0.75072	0.274271
ABCA6	0.563047	0.743556		0.20717	-1.19966		0.114431	-0.22994
ABCA7	0.805249	1.70313		0.684626	-1.42632		0.203604	0.2501
ABCA9	0.977551	-0.698775		0.517317	-0.110485		0.365282	0.220112
ABCB1	0.785322	-1.23859		0.517044	-1.05923		0.44956	-0.406363
ABCB10	0.904719	-0.897991		0.422482	-2.89398		0.0874991	-0.861884
ABCB11	0.712162	1.05124		0.638442	-1.18591		0.278885	-0.411284
ABCB8	0.0585444	-1.11214		0.260625	1.12378		0.439158	-1.8506
ABCC1	0.712749	-0.564305		0.000427297	-4.8753		0.00900361	-2.23471
ABCC2	0.776451	-1.26553		0.36245	0.745576		0.41596	-0.320897
ABCC3	0.921781	-1.34803		0.870278	1.06467		0.677198	0.517209
ABCC4	0.802509	0.123249		0.940741	-0.396468		0.648017	0.208657
ABCC8	0.339802	0.33152		0.48624	0.521878		0.47251	0.230135
ABCC9	0.898069	-0.221075		0.582575	-1.21364		0.429652	0.813648
ABCD2	0.196847	-0.703694		0.150917	-1.42567		0.00763896	-0.603004
ABCD4	0.342597	0.448787		0.343552	-1.00309		0.837041	-0.194432
ABCE1	0.452835	-0.245359		0.0591702	0.353635		0.832422	-0.566267
ABCG1	0.150034	-1.27336		0.109068	0.501217		0.739378	0.205153
ABCG2	0.329745	-2.22399		0.467794	-0.727448		0.511516	-0.230429
ABHD17A	0.870634	0.437372		0.264986	-1.68156		0.661114	-0.247238
ABI1	0.101862	0.925015		0.341461	-0.42692		0.0319306	-0.568692
ABL1	0.97865	0.313485		0.000251031	-3.91081		0.00333112	-0.883517
ABL2	0.0111679	-2.11808		0.546145	-0.489956		0.627057	0.132017
ABLIM2	0.950539	0.61845		0.729796	-1.60071		0.576975	0.1327
ABO	0.479803	-0.607969		0.0225329	-1.78539		0.817069	0.110313
ABTB1	0.920531	0.422274		0.35469	0.00967766		0.648017	0.347523
ACACA	0.481495	0.351316		0.0894599	1.5356		0.0463783	0.722445
ACACB	0.00892418	1.18184		0.588086	0.214333		0.803922	0.0513179
ACAD8	0.361016	0.6207		0.313105	-0.680212		0.292515	0.189007
ACADM	0.0200564	0.839216		0.113385	1.44372		0.177322	0.254419
ACADS	0.445325	-1.787		0.304669	-0.230631		0.257093	-0.735257
ACADSB	0.440378	-0.286102		0.583675	-0.797316		0.610771	-0.327764
ACAN	0.648159	0.282368		0.460284	0.866205		0.303391	0.591877
ACAT1	0.650424	-0.0413899		0.451566	0.336349		0.623825	0.148519
ACAT2	0.691154	-0.727595		0.095054	-1.69112		0.319989	-1.27643
ACCS	0.960608	0.844716		0.0707971	1.24922		0.683268	0.356883
ACE	0.285808	-0.567726		0.0743515	1.83434		0.168656	0.578817
ACE2	0.142494	-1.04521		0.354066	-0.722559		0.0545422	0.651578
ACHE	0.162442	1.041		0.0563743	-2.36823		0.0137519	-0.83395
ACO2	0.404651	0.192924		0.378293	-2.0306		0.417317	0.262294
ACOT13	0.154885	0.586328		0.165505	-2.30706		0.12551	-0.724658
ACOT6	0.652693	-0.692676		0.515036	-1.65872		0.733728	0.0349155
ACOX1	0.183745	-2.61292		0.559604	-0.478549		0.539748	-0.160338
ACP1	0.165541	0.507138		0.583125	-0.707517		0.119589	0.681184
ACP2	0.46093	-0.945669		0.388792	-2.94027		0.286127	-0.89667
ACP5	0.111449	0.271886		0.233722	-2.28512		0.189529	0.0635647
ACP6	0.661228	-0.3111		0.58395	-1.15102		0.814007	-0.141159
ACPP	0.0393572	-1.99352		0.541939	0.112437		0.709806	0.154467
ACPT	0.689704	-0.920559		0.565376	1.79452		0.426434	0.11193
ACSBG1	0.599176	0.164322		0.663844	-0.595916		0.848148	-0.133706
ACSL1	0.292034	-0.265497		0.139599	1.8698		0.310606	0.0277918
ACSL3	0.604657	0.334597		0.923537	-0.218622		0.592647	0.436934
ACSL4	0.475167	0.539787		0.39522	1.15357		0.990088	-0.289249
ACSL5	0.409812	-0.514738		0.252151	-0.507439		0.132085	-0.502352
ACSL6	0.560289	0.399001		0.0488238	-2.96954		0.00374337	-1.21271
ACSS1	0.325467	-1.98981		0.656242	-1.28264		0.785366	-0.922269
ACSS2	0.638287	-1.05671		0.124865	0.11819		0.68211	0.37727
ACTA1	0.129129	-1.05187		0.711456	0.680864		0.094162	-0.528242
ACTA2	0.115577	1.19005		0.242975	-0.472535		0.147606	-0.0655843
ACTB	0.0837274	-1.72617		0.681684	-1.07264		0.873558	0.154211
ACTG1	0.873518	0.297492		0.595505	0.766514		0.259545	0.715074
ACTL6B	0.371981	-1.89332		0.353173	0.574043		0.952982	-0.0992858
ACTR2	0.684492	-0.66369		0.183952	1.24553		0.279411	0.36281
ACTR3	0.0595485	-1.35056		0.196571	1.54537		0.901909	0.0557508
ACTR3B	0.464527	0.124839		0.606999	-0.806097		0.836733	0.220215
ACTR8	0.255634	-1.25919		0.554048	-1.79999		0.131355	-0.823878
ACVR1	0.113112	0.971517		0.129205	-1.54103		0.382408	-0.221742
ACVR1B	0.0975903	0.279952		0.630731	-0.767482		0.247767	-0.211592
ACVR1C	0.380258	-0.305615		0.846676	0.734562		0.66512	-0.21756
ACVR2A	0.408211	0.742452		0.0346738	1.44195		0.404526	0.197054
ACVR2B	0.130779	-0.774176		0.408268	-4.2819		0.686166	-0.358039
ACVRL1	0.520057	0.651417		0.770941	0.148416		0.480571	0.220767
ACY1	0.415611	0.700916		0.829766	-0.884203		0.210705	-0.575224
ACY3	0.606856	0.416929		0.440564	-0.411124		0.938226	0.0204085
ACYP1	0.416288	0.718157		0.356569	-0.47334		0.512531	-0.229161
ACYP2	0.336626	-0.361255		0.267572	0.89397		0.178847	0.276477
ADA	0.791876	-1.63288		0.825281	0.530317		0.767664	0.161206
ADAM12	0.891844	0.179006		0.210957	1.15857		0.815538	0.23815
ADAM15	0.0676912	-1.5482		0.985132	-1.12996		0.732244	-0.196325
ADAM17	0.952456	0.157278		0.819159	-0.870019		0.399211	0.283224
ADAM19	0.626245	-0.667994		0.432767	0.0457736		0.990088	-0.163869
ADAM22	0.358743	-0.569687		0.046253	1.18662		0.334532	-0.347905
ADAM28	0.979435	-0.442968		0.818536	0.0667382		0.445483	0.039806
ADAM33	0.462846	-0.690232		0.947439	-0.561778		0.290245	-0.916155
ADAMTS12	0.698211	0.0155108		0.836484	-0.520397		0.858913	0.0512923
ADAMTS20	0.084902	-2.37432		0.140736	0.496745		0.110748	0.616327
ADAMTS5	0.870729	0.174662		0.00834138	1.92898		0.020877	0.653174
ADAMTSL1	0.903054	0.268074		0.834456	-0.350967		0.378803	0.081467
ADAMTSL3	0.129083	-2.09888		0.626464	0.550732		0.612154	-0.127116
ADAMTSL5	0.12662	-0.464363		0.666756	-0.490464		0.0310537	-0.807246
ADAR	0.632114	-1.11835		0.278977	0.218251		0.0772096	-0.861883
ADC	0.221049	0.147058		0.543097	-1.65466		0.305062	-0.529223
ADCK1	0.756621	0.866742		0.964998	-0.490931		0.998899	0.248985
ADCK2	0.13229	0.738406		0.165505	1.72345		0.142384	0.309394
ADCK3	0.0687567	0.458847		0.0729223	0.399895		0.477966	-0.113284
ADCK4	0.378338	0.124791		0.0943417	1.48059		0.0782721	0.669948
ADCK5	0.576404	-2.02116		0.689343	-0.411291		0.942933	-0.196394
ADCY1	0.399787	0.162276		0.347651	-0.361065		0.264948	0.479885
ADCY10	0.78249	-0.104307		0.412369	-0.846419		0.710981	-0.183093
ADCY2	0.347624	-1.27036		0.498635	-0.637146		0.489696	-0.138623
ADCY3	0.586926	-0.373762		0.837272	-0.329745		0.760915	0.0499109
ADCY4	0.101565	1.51806		0.107356	1.57144		0.208381	-0.475052
ADCY5	0.556424	-1.3749		0.294824	-2.23553		0.798434	-0.228546
ADCY6	0.477604	0.118422		0.512194	0.601965		0.809113	-0.439031
ADCY7	0.0972773	0.882924		0.0164722	1.56157		0.0228999	0.745007
ADCY8	0.907731	-0.514267		0.493287	-0.719285		0.499665	0.0349169
ADCY9	0.24207	-0.714235		0.745413	0.40691		0.900233	0.230062
ADCYAP1	0.129838	-1.1559		0.360374	-0.74193		0.426905	-0.112341
ADD1	0.489148	-1.03219		0.0473556	1.63523		0.180125	0.490646
ADH1A	0.0358516	1.02521		0.192563	-0.0986215		0.612984	0.124004
ADH1B	0.506139	-0.993022		0.639991	-0.622489		0.163677	-0.361038
ADH1C	0.189186	0.886131		0.0692854	-1.3347		0.221291	-0.567072
ADH4	0.596716	0.493975		0.564563	-1.11451		0.254938	-0.456281
ADH5	0.568372	0.130233		0.47626	0.47475		0.945445	0.179434
ADH6	0.157643	0.672283		0.341311	1.45586		0.270567	0.0553972
ADH7	0.858041	-1.15099		0.272628	0.644338		0.308034	0.129926
ADHFE1	0.00658233	2.3241		0.757491	-1.40072		0.53176	0.209996
ADIRF	0.357537	-1.33479		0.86846	-0.291683		0.8815	0.193418
ADK	0.184427	0.298949		0.139472	-1.46822		0.847531	-0.0592751
ADM	0.181066	-1.08363		0.0321011	-1.29447		0.0577932	0.0168692
ADM2	0.871968	-0.481021		0.388571	-0.41742		0.146396	0.121012
ADORA1	0.0988649	-0.836882		0.327862	0.548173		0.607457	-0.159964
ADORA2A	0.158455	-0.692985		0.796189	-0.690164		0.831192	0.947133
ADORA2B	0.15892	-1.12754		0.896215	-0.746405		0.167767	0.0770882
ADORA3	0.36058	-0.196746		0.0684542	-2.29756		0.937285	-0.186928
ADPRHL1	0.385839	-1.30389		0.620229	-0.00233155		0.989144	0.130348
ADRA1A	0.183777	0.481991		0.0906914	0.388578		0.130751	-0.728903
ADRA1B	0.32877	-0.552438		0.499382	0.438977		0.443369	-0.111116
ADRA1D	0.940238	-0.186156		0.87754	0.597934		0.753714	-0.141245
ADRA2A	0.798555	1.07702		0.0718031	1.453		0.388058	0.298679
ADRA2B	0.964058	-0.503123		0.480238	0.623699		0.651708	0.151277
ADRA2C	0.615963	-0.0919738		0.534098	0.720795		0.158138	0.547021
ADRB1	0.783095	0.884161		0.331641	-1.17838		0.071574	-0.829276
ADRB2	0.523381	0.266584		0.606719	-0.580093		0.864555	-0.202426
ADRB3	0.101718	0.990824		0.585603	-0.499233		0.637843	-0.403358
ADRBK1	0.826642	0.125098		0.805481	0.00728642		0.202624	0.417742
ADRBK2	0.907108	0.451727		0.529693	-0.847891		0.0218341	-0.585551
ADSS	0.0409468	-1.34866		0.37642	-1.87195		0.950433	-0.0221503
ADSSL1	0.346817	-0.937791		0.0235229	-2.37447		0.0353846	-0.495541
AFAP1L2	0.0657301	-2.26442		0.127663	-1.3998		0.168867	-0.357442
AFF1	0.251543	-0.68874		0.580652	-0.368378		0.086916	0.747303
AFF3	0.0459919	-1.63852		0.281654	-0.0787042		0.596727	-0.0881643
AFF4	0.471283	0.828432		0.810137	-0.112083		0.99292	0.0262896
AFG3L2	0.21169	2.12891		0.997602	-0.793844		0.363197	-0.0708736
AFMID	0.906796	-0.238215		0.169576	-1.07185		0.455186	0.183234
AFP	0.220307	0.112963		0.980657	-0.225395		0.760614	0.166414
AGAP2	0.370507	-0.959596		0.300512	0.885982		0.207986	0.314982
AGFG2	0.25547	-0.371641		0.893996	-0.369057		0.336177	-0.401817
AGPAT2	0.825109	-0.272819		0.110046	-0.811592		0.73076	-0.297828
AGT	0.779586	0.256459		0.17442	-0.588106		0.782314	0.145312
AGTR1	0.217553	-0.748611		0.378475	0.847488		0.384598	-0.933173
AGTR2	0.13595	-0.337959		0.592379	-0.287109		0.794496	-0.177898
AGXT	0.218829	-0.911861		0.954141	-0.318427		0.901284	0.139413
AGXT2	0.543295	0.139193		0.94106	-0.739137		0.648301	-0.0669011
AHCY	0.0531973	-0.504955		0.743508	0.627986		0.471781	0.0696878
AHCYL2	0.400669	-1.34473		0.185279	-0.458561		0.125413	-0.824066
AHNAK	0.0658773	-1.49092		0.398122	0.31977		0.0972657	0.196406
AHR	0.796428	-2.13275		0.998483	-0.377147		0.57048	0.209436
AICDA	0.446464	0.29746		0.534362	0.414918		0.379658	0.521137
AIF1	0.960922	-0.70292		0.539702	-1.24718		0.872315	0.181277
AIFM1	0.00514914	-2.0559		0.60993	-0.727121		0.873869	0.19087
AIFM2	0.165541	-0.412085		0.226102	-1.02905		0.222735	-0.406574
AIM1	0.263618	-0.301123		0.149615	-1.538		0.0271584	-0.92164
AJUBA	0.263003	-1.01573		0.0607362	1.26062		0.276443	0.405982
AK1	0.202482	0.896237		0.230434	0.430721		0.411004	0.360718
AK2	0.188209	-0.559408		0.46909	-0.37937		0.758512	0.389815
AK3	0.236103	0.49817		0.450122	0.116573		0.0405288	0.587635
AK4	0.0546786	0.80958		0.174529	-0.989886		0.281676	-0.271889
AK5	0.192627	0.830708		0.936915	0.576474		0.48352	0.47603
AK7	0.802205	0.231804		0.173215	-1.4308		0.698095	-0.257608
AK8	0.927408	0.596261		0.966915	-0.0589314		0.70014	-0.23058
AKAP1	0.277483	-0.333895		0.170355	-1.63082		0.030352	-0.84279
AKAP10	0.0413535	-1.66158		0.464188	0.302983		0.849384	-0.277226
AKAP11	0.487666	-0.392449		0.50142	-2.52437		0.615201	0.21119
AKAP12	0.133692	1.0177		0.239277	-1.13689		0.0560778	-0.460364
AKAP13	0.423546	0.359584		0.0834455	0.995122		0.596744	0.233306
AKAP14	0.217815	-1.41454		0.753773	0.922873		0.200763	0.272603
AKAP2	0.315879	-1.61826		0.0513382	1.6519		0.597839	0.606359
AKAP3	0.333272	-0.540017		0.0481215	-3.01253		0.0746047	-0.50421
AKAP4	0.799771	-0.207442		0.0337294	-0.136762		0.920047	-0.309095
AKAP5	0.330877	-0.793296		0.24778	0.57624		0.313193	-0.768072
AKAP6	0.203879	-1.16386		0.899069	0.510139		0.905345	0.161417
AKAP7	0.244614	0.416763		0.81138	-0.514499		0.939481	-0.291603
AKAP8	0.125257	-1.41817		0.80269	0.347303		0.683848	0.112835
AKAP8L	0.561719	0.686098		0.728844	-0.371395		0.799289	0.157761
AKAP9	0.811653	0.359435		0.187818	0.736776		0.636717	-0.205223
AKR1A1	0.865154	-0.669283		0.313992	-1.76294		0.800262	0.295633
AKR1B1	0.654112	0.528878		0.35365	1.66253		0.160241	0.324008
AKR1B10	0.671529	0.0032552		0.0195663	1.82544		0.00658324	0.953714
AKR1C1	0.573989	0.553978		0.62221	0.118495		0.134921	0.148128
AKR1C2	0.351069	-0.0700971		0.0970386	-1.54415		0.493671	-0.145201
AKR1C3	0.531814	-0.387354		0.368069	-0.33586		0.720763	-0.251756
AKR1C4	0.403764	-0.420131		0.366905	0.429506		0.254938	-0.169521
AKR1D1	0.712162	0.193163		0.131601	-1.91577		0.14849	-0.431118
AKT1	0.0218922	-1.70162		0.39233	-2.32695		0.54171	0.211602
AKT2	0.212699	-0.67841		0.113112	1.42789		0.54819	0.0771015
AKT3	0.0585969	-1.91464		0.567418	-0.773133		0.160476	-0.293742
ALAD	0.413136	0.33046		0.381119	-0.382262		0.212146	-0.550393
ALAS1	0.492119	0.199657		0.08316	-1.37984		0.255927	-0.87835
ALAS2	0.0789169	0.682921		0.478247	-0.456691		0.404081	0.5422
ALCAM	0.854952	-0.00605315		0.702377	-1.66267		0.239633	-0.742542
ALDH18A1	0.571846	-0.288978		0.163316	0.452179		0.0572232	0.638702
ALDH1A1	0.166631	-0.979758		0.926782	0.33114		0.309219	0.179715
ALDH1A2	0.604657	-0.396408		0.446046	0.071099		0.535909	0.337905
ALDH1A3	0.274529	-0.931794		0.322345	-0.546245		0.326558	-0.509618
ALDH1B1	0.645049	0.477915		0.85013	-0.10627		0.100899	-0.732465
ALDH1L1	0.173857	-0.568201		0.0603661	-0.554597		0.0131168	-0.882985
ALDH2	0.380306	0.193775		0.281403	0.329218		0.99229	-0.347262
ALDH3A1	0.207545	0.138127		0.0460288	-2.9962		0.140462	0.668881
ALDH3A2	0.164463	-1.07226		0.131806	-0.790607		0.0419792	-0.818835
ALDH3B1	0.511666	0.667793		0.705351	-0.658282		0.172681	0.670934
ALDH3B2	0.141001	1.5513		0.551367	0.181577		0.20123	-0.86185
ALDH4A1	0.3638	-0.424998		0.108489	-1.06836		0.0230632	0.480322
ALDH5A1	0.0996778	0.777361		0.310346	-1.073		0.303577	-0.439423
ALDH6A1	0.245588	-0.0806479		0.744773	-0.0321743		0.178244	0.593664
ALDH7A1	0.952456	0.438449		0.793098	-2.68016		0.769944	-2.11138
ALDH9A1	0.372192	-1.70796		0.421017	-1.35833		0.952039	-0.55092
ALDOA	0.296372	0.402395		0.242753	0.495189		0.167206	0.423981
ALDOB	0.37367	-1.70767		0.631704	-1.796		0.667414	-0.128459
ALDOC	0.130267	-1.66998		0.124012	-1.21799		0.113036	-0.719617
ALG12	0.700755	-1.28209		0.11746	0.46254		0.628576	-0.383709
ALK	0.541208	-0.750998		0.0137548	1.59798		0.755812	0.223513
ALKBH2	0.125451	0.969946		0.930542	0.589025		0.474701	-0.144681
ALKBH3	0.761414	0.41849		0.24104	0.257986		0.674315	0.169981
ALLC	0.230088	0.352398		0.511936	0.705719		0.576388	0.225802
ALMS1	0.482253	-0.666526		0.191638	-2.75946		0.250683	-0.573193
ALOX12	0.451415	-0.199969		0.887345	-0.61261		0.523768	-0.375042
ALOX15	0.165541	-1.15666		0.0446057	-1.92706		0.115612	-0.806945
ALOX15B	0.109167	-0.45485		0.585007	-0.498703		0.235404	0.897283
ALOX5	0.437585	-0.722685		0.161149	-0.431982		0.41596	0.170762
ALPI	0.293089	-0.367595		0.972986	-0.644703		0.791741	-0.422806
ALPK1	0.0757	-1.05315		0.742217	0.222501		0.855288	-0.137793
ALPK2	0.871658	-0.919421		0.260885	-0.0562067		0.610771	-0.117315
ALPK3	0.874759	0.102347		0.956056	-0.343096		0.291145	-0.559804
ALPL	0.315836	-1.43887		0.0420728	-1.34995		0.136368	-0.361911
ALPP	0.3468	-0.551954		0.539702	-0.363365		0.0149012	-1.04821
ALPPL2	0.762614	0.306713		0.62136	-1.18526		0.996381	-0.1698
ALS2	0.0783817	-1.53981		0.115872	0.455944		0.103298	0.885458
AMBP	0.437817	-1.28089		0.845735	-0.269645		0.160946	-0.537857
AMD1	0.0550154	-1.90105		0.683448	0.220052		0.47081	0.129698
AMER1	0.744175	0.21738		0.130122	-1.55095		0.18094	-0.0949703
AMER2	0.289669	-0.952832		0.312069	-0.855896		0.190062	-0.504071
AMFR	0.459257	-1.03159		0.966276	-1.41752		0.53176	0.0468598
AMH	0.513948	-1.33835		0.550564	0.591328		0.172805	0.540744
AMHR2	0.861441	0.469435		0.643605	-0.607067		0.956752	0.212455
AMN	0.659232	-1.11814		0.952226	-1.09086		0.388491	0.112511
AMPD1	0.125354	-0.638856		0.731115	-0.693506		0.118097	-0.764803
AMPD2	0.414935	-0.781206		0.0416822	1.04501		0.102134	0.625166
AMPD3	0.328965	-0.210371		0.601129	0.471631		0.129152	-0.490735
AMT	0.793999	0.569783		0.590573	-0.544337		0.817682	0.201875
AMY1A	0.512933	-1.15569		0.568563	-0.473147		0.252968	0.268643
AMY2A	0.318043	-1.75236		0.151157	0.447988		0.214467	0.360991
AMY2B	0.560631	-1.58772		0.238602	0.495427		0.159101	0.121364
ANAPC1	0.353923	-1.61532		0.981936	-0.257007		0.782032	-0.0675508
ANAPC10	0.139519	-0.237655		0.020617	1.23194		0.769643	-0.328521
ANAPC11	0.0865234	0.737776		0.0883578	-4.08605		0.0877026	0.936324
ANAPC13	0.118985	-2.02824		0.461344	-0.200136		0.124347	-1.65566
ANAPC2	0.164583	-2.77636		0.269501	-1.57509		0.409211	-1.0812
ANAPC4	0.0186306	-2.49356		0.603374	-1.39901		0.661529	-0.690515
ANAPC5	0.0031287	-2.9064		0.92412	-0.524172		0.987227	0.390378
ANAPC7	0.215165	1.22664		0.191062	-1.80493		0.00735896	-0.784307
ANG	0.016856	-1.81991		0.739269	-0.670085		0.343159	-0.136374
ANGEL1	0.520057	0.789282		0.451566	0.18131		0.377522	0.254757
ANGPT1	0.400449	-0.576633		0.640734	-0.715587		0.793869	0.197659
ANGPT2	0.997517	-0.229454		0.741578	0.308414		0.277713	0.415273
ANGPTL1	0.607989	-0.305049		0.257786	-0.954303		0.609835	-0.15621
ANKK1	0.938672	0.986381		0.75201	-0.361172		0.49044	0.332195
ANLN	0.727178	-3.44211		0.0736	1.3561		0.688385	-0.458312
ANO3	0.104211	-1.81617		0.0400165	-0.972513		0.184261	-0.78341
ANP32B	0.30277	0.0671691		0.788467	0.486982		0.612984	-0.324243
ANPEP	0.462607	-0.161578		0.781074	-0.127669		0.807585	-0.304125
ANXA1	0.672103	-0.568287		0.318053	-2.91261		0.336177	-0.0704805
ANXA2	0.614579	1.08443		0.422496	0.431159		0.864555	-0.11082
ANXA3	0.784607	0.323031		0.458338	0.28814		0.688778	0.020269
ANXA4	0.973471	-0.0954331		0.223805	0.600002		0.447603	-0.930031
ANXA5	0.869489	0.00793992		0.394775	-0.396351		0.927251	-0.690857
ANXA8	0.487979	-0.726113		0.761383	-0.665919		0.4436	-0.304216
AOC2	0.889977	-0.389569		0.491525	-0.436286		0.374969	0.129551
AOC3	0.70455	0.415688		0.815112	0.0311701		0.44666	0.530112
APAF1	0.1219	-2.33332		0.415914	0.451073		0.729847	0.231961
APBB1	0.909915	0.174673		0.0640746	-2.40389		0.436596	-0.562284
APBB1IP	0.252847	-0.80373		0.252649	1.02659		0.217983	-0.439832
APBB2	0.940864	-1.10145		0.0773495	1.55027		0.0227584	0.884027
APC	0.325273	0.417214		0.369464	-1.47056		0.0663382	0.199122
APC2	0.516743	-0.0597951		0.862712	-0.830076		0.486479	-0.372057
APCDD1L	0.0258748	1.06184		0.894947	0.532561		0.0170728	0.838176
APCS	0.912724	0.295785		0.298273	1.16999		0.853095	-0.213881
APEX1	0.401111	1.01327		0.0433444	-1.42764		0.962095	0.233893
APEX2	0.612921	0.53019		0.506792	-0.354974		0.164031	0.1133
API5	0.536788	-0.279975		0.818536	-1.9044		0.705699	-0.48926
APLF	0.938046	-1.76881		0.716499	-0.382539		0.790221	-0.203164
APOBEC3A	0.468381	0.256635		0.580927	-0.61554		0.254774	0.444973
APOBEC3C	0.267504	-1.43296		0.977461	-1.53402		0.988829	-0.149254
APOBEC4	0.211115	1.50383		0.113568	-1.34321		0.644335	-0.519895
APOD	0.414485	-1.13005		0.885275	-1.62341		0.0184753	1.16116
APOE	0.638005	-0.182982		0.307678	0.201991		0.475433	-0.764385
APOH	0.457887	-3.7199		0.604243	-0.782123		0.487067	-0.160295
APP	0.400449	0.00698942		0.346008	-0.573403		0.66885	0.187809
APPL1	0.6204	0.701584		0.348063	0.398633		0.759713	-0.281602
APPL2	0.82419	-1.55806		0.176784	-0.698388		0.743252	0.341744
APRT	0.974017	0.249234		0.370973	0.229943		0.399432	0.26677
APTX	0.209539	-0.978103		0.595008	-1.60823		0.320225	-0.574044
AQP1	0.950889	0.453746		0.469587	0.308008		0.592374	-0.191311
AQR	0.0976117	-1.89726		0.941357	-0.752064		0.823206	-0.202556
AR	0.802813	0.409856		0.484986	-0.558656		0.116619	-0.523014
ARAF	0.0277968	1.13701		0.474772	0.401684		0.55769	0.326317
ARAP1	0.280975	-1.17485		0.0214823	1.07815		0.471296	0.343393
AREG	0.693917	-1.43733		0.87994	-0.589438		0.237395	-0.67281
ARF1	0.208398	0.294892		0.0717152	0.482988		0.00808268	0.771971
ARF4	0.139707	-0.18862		0.473772	-0.458817		0.818908	-0.181458
ARF6	0.488654	-0.375209		0.0576766	-2.88938		0.611324	0.0793175
ARG1	0.665227	0.741413		0.852015	0.235199		0.638688	-0.177897
ARG2	0.78612	-0.670405		0.773087	0.0178856		0.274185	-0.0963187
ARGLU1	0.33406	-2.53672		0.0809633	1.44848		0.0265878	0.797535
ARHGAP11A	0.532645	-0.8394		0.040912	-1.30789		0.0592122	-0.503722
ARHGAP20	0.186667	-1.0254		0.333841	0.580774		0.0734399	-0.365896
ARHGAP25	0.0415106	0.739135		0.154313	0.428503		0.306739	0.199449
ARHGAP26	0.168441	1.50261		0.204451	0.402055		0.197501	0.476962
ARHGAP29	0.993563	-0.315921		0.287606	-1.3932		0.609941	-0.29794
ARHGAP35	0.257074	-0.297177		0.358677	-2.06501		0.0944075	0.606153
ARHGEF12	0.327018	-1.24078		0.58285	0.0849547		0.493422	-0.326478
ARHGEF25	0.668088	0.277679		0.161749	0.42393		0.811865	0.115945
ARHGEF40	0.154087	0.766434		0.0827332	-3.46226		0.107109	-0.320405
ARHGEF6	0.904925	-1.27916		0.359235	-2.49746		0.387841	-0.0169594
ARHGEF7	0.769223	0.166247		0.974904	0.0659824		0.719224	-0.110489
ARID1A	0.1997	-0.39948		0.18542	0.392947		0.315214	-0.689893
ARL1	0.656386	0.278179		0.33184	-0.537647		0.929132	-0.204439
ARL2BP	0.593172	-0.200581		0.136386	0.729956		0.534351	0.171863
ARL3	0.726587	0.659349		0.545225	-0.837899		0.865176	-0.262979
ARL5A	0.935855	-0.487145		0.389012	-0.915231		0.692849	-0.217976
ARL5B	0.338212	-0.502969		0.7	-0.364638		0.935716	-0.25828
ARL9	0.322956	0.383371		0.680508	-0.522684		0.544255	-0.149874
ARMC6	0.72836	0.0811744		0.619381	0.205549		0.371371	0.319111
ARNT	0.70067	-0.307191		0.38839	0.429738		0.768299	0.372748
ARNT2	0.669873	0.376709		0.0729223	0.692806		0.178847	0.542554
ARPC1A	0.857585	-0.328483		0.876908	-1.58793		0.681243	-0.405999
ARPC1B	0.758118	-0.353658		0.642743	0.214987		0.720995	-0.136319
ARPC2	0.0110549	-2.34653		0.280649	2.07953		0.132265	1.00577
ARPC3	0.815928	-0.49259		0.841344	-0.328319		0.762117	-0.0156731
ARPC4	0.889666	-0.627562		0.00389683	1.58335		0.180638	0.410057
ARPC5	0.989795	-0.375559		0.5989	1.05174		0.663402	0.102454
ARRDC4	0.579632	-0.404557		0.591957	-0.477091		0.362781	-0.383494
ARSA	0.392558	-0.321568		0.405095	-0.681978		0.0659891	-0.535038
ARSD	0.359054	-0.538686		0.164773	-2.0865		0.810336	0.23579
ARSJ	0.346817	-0.315835		0.856102	-1.32396		0.873869	-0.366581
ART1	0.415386	-0.14091		0.759931	-0.222871		0.195997	0.316618
ASCC3	0.0207826	-2.04296		0.64802	-1.31115		0.530224	0.0478799
ASF1A	0.0053795	-1.49684		0.936596	-0.548307		0.0528299	0.648214
ASGR2	0.339802	-0.682681		0.614971	-0.737961		0.514819	-0.196832
ASL	0.860514	-0.668445		0.06228	1.2847		0.778702	0.696391
ASMT	0.126132	-2.38646		0.840091	-1.88689		0.920673	-0.217774
ASNA1	0.269547	-2.15156		0.000349851	1.63318		0.0853285	0.757992
ASNS	0.236103	-0.0271842		0.600293	-1.22441		0.0222459	0.697628
ASPA	0.0700312	2.44224		0.203025	1.82608		0.124386	-1.09196
ASPH	0.262443	-1.82005		0.446763	0.374293		0.113438	0.399181
ASPM	0.657809	-0.275804		0.0954516	-2.56474		0.655406	-0.612643
ASPSCR1	0.483972	-0.523415		0.738059	0.402004		0.955809	-0.0121625
ASRGL1	0.632674	-0.685126		0.236889	0.262073		0.199937	0.242777
ASS1	0.587475	-0.218875		0.903988	-0.0762303		0.895978	0.605503
ASTN1	0.386486	-0.604404		0.345598	0.269637		0.794477	-0.0857318
ATF1	0.299092	-0.395003		0.263957	-1.90395		0.480325	-0.211722
ATF2	0.618457	-0.607149		0.403289	-0.339196		0.47324	-0.377659
ATF3	0.386646	-0.855725		0.0903402	-1.61309		0.0590002	-1.05541
ATF5	0.0022445	-3.24383		0.0572041	-2.67363		0.255572	0.782841
ATG10	0.0211322	-2.06243		0.215662	-1.83224		0.735167	-0.180158
ATG12	0.566505	-1.4661		0.774042	0.465773		0.456319	0.20083
ATG14	0.12711	1.25418		0.0144142	-1.3294		0.457093	-0.81518
ATG3	0.0587546	1.15687		0.620512	0.454011		0.631939	0.353682
ATG4A	0.486926	-0.19305		0.431333	-0.781731		0.987256	-0.143244
ATG5	0.105645	1.0308		0.167717	-1.80071		0.271769	-0.705867
ATG7	0.638287	-0.265686		0.961804	-0.935687		0.769944	-0.0432837
ATIC	0.583679	-0.252708		0.590297	0.0981982		0.303762	0.105055
ATM	0.156345	-1.14484		0.51869	-1.7861		0.265018	-0.608869
ATOH7	0.824803	-0.833334		0.467374	-0.361146		0.938226	-0.274921
ATOX1	0.532128	-0.0669962		0.762985	-0.833233		0.803006	-0.210686
ATP11A	0.599533	0.406703		0.324506	0.685353		0.0499068	0.692391
ATP13A1	0.790057	-0.522523		0.166363	-3.04869		0.058263	-1.00031
ATP1A1	0.0964019	-1.38983		0.359713	0.167747		0.215342	0.551653
ATP2A1	0.923969	-0.378577		0.670257	-0.517177		0.312939	-0.278834
ATP2C1	0.0201195	0.588482		0.362241	-1.29304		0.492676	-0.548574
ATP4A	0.362155	-0.614096		0.123708	1.36469		0.477631	0.375619
ATP5A1	0.0653009	-0.725537		0.0505294	0.0888577		0.04186	0.553791
ATP5B	0.318545	-1.50645		0.144365	-0.364273		0.0181638	0.187497
ATP5C1	0.765916	-0.220361		0.075088	-0.88194		0.0415041	-0.658495
ATP5D	0.30462	-1.20438		0.909863	0.58679		0.79752	0.18844
ATP5J2	0.00623845	-1.18561		0.399405	0.453762		0.0307472	0.945826
ATP6V0A1	0.917719	0.224696		0.535153	-0.409051		0.605803	-0.230705
ATP6V0A4	0.342397	-0.968469		0.0949301	1.16397		0.045608	0.622037
ATP6V1A	0.0714421	-1.00774		0.758406	0.335246		0.235559	0.307837
ATP6V1B2	0.73043	-0.68816		0.0744344	-3.09007		0.930072	-0.880908
ATP6V1C1	0.0760698	-0.69912		0.511049	-0.634115		0.822825	0.0915488
ATP6V1D	0.970961	-0.31722		0.436301	-1.16347		0.259076	-0.271685
ATP6V1E1	0.705719	-0.561295		0.377642	-0.877655		0.683268	-0.680677
ATP6V1G1	0.245893	-1.69955		0.557273	-0.45681		0.638406	0.333929
ATP6V1G2	0.116216	-0.897139		0.545491	-0.26061		0.571552	0.106432
ATP6V1G3	0.148491	-0.512542		0.0243895	1.05801		0.304436	0.0682543
ATP8A1	0.806773	0.0970911		0.760813	0.24546		0.718002	-0.15374
ATP8A2	0.871658	-0.57224		0.555122	-0.292375		0.435666	0.624626
ATR	0.0635401	-0.986946		0.993742	-0.211349		0.737295	-0.847953
ATRAID	0.927095	-0.611429		0.831954	-0.359086		0.756112	-0.505924
ATRNL1	0.465008	-1.40064		0.894947	-0.0572444		0.371582	0.568978
ATRX	0.977238	-0.398036		0.8148	-1.01157		0.918481	-0.637289
ATXN10	0.105391	-3.77401		0.463918	-0.180017		0.711275	0.502631
ATXN3	0.87662	0.288323		0.922264	0.331184		0.430805	-0.28511
AURKA	0.039653	-4.10738		0.0593738	-2.25026		0.00372427	-3.4726
AURKAIP1	0.228292	0.772294		0.467402	-0.516024		0.166506	-0.598166
AURKB	0.0633933	-1.70511		0.235666	0.587419		0.718414	0.0419006
AURKC	0.125506	1.41896		0.299326	-1.14727		0.109871	0.336398
AVEN	0.20304	-1.07039		0.21866	0.0454354		0.0525889	0.687983
AVPI1	0.839233	-0.892937		0.890828	0.0982615		0.345978	-0.661607
AVPR1A	0.11207	-1.7512		0.236052	-2.00949		0.115521	-0.667968
AVPR1B	0.411565	0.14566		0.954141	-0.392596		0.965238	0.00912378
AVPR2	0.161733	0.992518		0.120974	-1.61918		0.468871	0.153032
AXIN1	0.529805	-0.555008		0.655428	-0.287299		0.454472	-0.35936
AXIN2	0.434802	-0.121549		0.0350932	0.765926		0.265625	1.10486
AXL	0.18287	-1.50546		0.383083	-0.704471		0.153086	-0.209654
AZGP1	0.244774	-2.2937		0.0984646	-1.35719		0.143574	0.51383
AZI1	0.909291	-0.0683828		0.126548	0.808741		0.760915	0.140502
B2M	0.661228	-0.291085		0.391887	1.1161		0.214904	0.509098
B3GALT4	0.446229	0.429281		0.165017	1.13983		0.105063	0.616369
B3GAT1	0.842002	-0.302366		0.318442	-1.201		0.485985	-0.19389
B3GAT3	0.0303185	-1.87638		0.419027	-1.62024		0.626897	-0.239826
B3GNT3	0.750344	-0.382576		0.715798	-0.436606		0.669999	-0.117387
B3GNT6	0.399567	-0.920235		0.861767	-0.526277		0.406307	-0.582452
B3GNT7	0.800379	-0.450079		0.431358	0.595499		0.979076	0.172474
B4GALT1	0.464767	-0.276667		0.298087	0.63906		0.399432	0.0910548
B4GALT2	0.120294	0.799387		0.400588	-1.01122		0.667701	0.854523
B4GALT3	0.120388	0.798464		0.910498	-1.70692		0.0648935	0.632517
B4GALT4	0.102461	-1.91489		0.0657469	1.05436		0.255501	-0.30879
B4GALT5	0.0570389	-0.455978		0.774008	-1.45374		0.431728	-0.472413
B4GALT6	0.729247	0.627075		0.314377	0.669334		0.667127	0.199502
BAAT	0.0659352	0.992763		0.238956	-1.16287		0.159889	-0.668278
BACE1	0.775245	-1.55269		0.0267908	2.75725		0.00158124	0.873746
BAD	0.680485	0.447045		0.350115	0.309588		0.886752	0.193065
BAG1	0.327602	-0.389686		0.49684	-0.896869		0.0900128	-0.879871
BAGE	0.03462	-2.22085		0.0453266	-1.93943		0.631378	-0.302969
BAI1	0.236415	-0.594271		0.573536	-1.50033		0.0154767	0.754905
BAI3	0.390166	-1.51459		0.756577	-0.579212		0.479345	-0.378238
BAIAP2L1	0.00436256	1.27886		0.644179	-0.815392		0.782638	-0.142555
BAK1	0.826335	-0.561559		0.0731411	0.711723		0.120718	0.0790573
BANP	0.187965	-0.370279		0.659486	-1.4074		0.79326	-0.508321
BARD1	0.510654	-0.497146		0.262418	-0.189805		0.142813	0.0401378
BAX	0.529805	0.361457		0.0512425	1.43265		0.328116	0.378103
BBC3	0.0389456	-1.56603		0.666963	-1.18736		0.274358	-0.155408
BBOX1	0.113963	-1.03276		0.0116356	1.14447		0.0813923	-0.414326
BBS4	0.691154	0.451029		0.708331	0.409867		0.172433	0.248524
BCAR1	0.290567	-0.511955		0.775013	-1.37611		0.320949	0.337613
BCAS1	0.295081	0.966219		0.814489	-1.20777		0.72129	0.319302
BCAS2	0.0253031	-1.73705		0.78785	-0.180892		0.663975	-0.226216
BCAS3	0.686517	-0.208484		0.498619	0.011006		0.589378	-0.307447
BCAT1	0.504855	0.316763		0.98801	0.257421		0.886002	-0.191259
BCAT2	0.574257	-0.496687		0.227951	-0.499312		0.381586	-0.672656
BCCIP	0.104127	-3.78019		0.209234	0.490651		0.748995	-0.690263
BCHE	0.0383941	-1.67798		0.899704	-1.20546		0.335385	-0.660163
BCKDK	0.45711	-0.0756349		0.838212	-0.858231		0.39613	0.172846
BCL10	0.73695	0.717595		0.479491	-0.982961		0.520435	-0.371632
BCL11A	0.418322	-0.362917		0.128955	0.353457		0.622988	-0.342319
BCL11B	0.331616	0.467127		0.0777763	-0.871368		0.385953	-0.199401
BCL2	0.0799961	-1.35326		0.269826	-0.572401		0.0606058	0.227343
BCL2A1	0.351883	0.835784		0.38352	-0.103307		0.511516	-0.591279
BCL2L1	0.0563504	-1.41728		0.732078	-0.301273		0.10904	-0.439663
BCL2L10	0.572381	-0.97712		0.416641	-1.8199		0.974043	0.330841
BCL2L11	0.442947	-1.16336		0.129359	-0.0805951		0.707165	0.101813
BCL2L12	0.307223	-1.61793		0.601408	-0.123177		0.811865	-0.168174
BCL2L13	0.185731	1.11421		0.941378	-0.511231		0.518644	-0.132081
BCL2L14	0.22704	-1.04813		0.180411	-0.665684		0.0777682	-0.491457
BCL2L2	0.197424	-1.33277		0.0657469	-2.09631		0.163066	-0.896067
BCL3	0.711869	-0.435692		0.889669	-0.125991		0.107712	-0.63385
BCL6	0.338609	1.01147		0.0346964	1.34417		0.753728	0.278036
BCL7A	0.672898	-0.492301		0.43929	0.0469188		0.825045	-0.937388
BCL7B	0.602187	-0.578094		0.614302	-0.459731		0.904408	-0.147462
BCL9	0.952522	0.415156		0.551779	-0.34683		0.964347	-0.341028
BCLAF1	0.126035	1.76859		0.898435	0.87394		0.676333	0.969034
BCMO1	0.561454	-0.0113598		0.97011	-0.588546		0.999528	0.508711
BCR	0.836158	-1.52534		0.149599	-0.933396		0.48821	0.197285
BDH1	0.573721	-0.443983		0.142174	-1.37574		0.00838958	-0.657208
BDKRB2	0.21502	-1.57934		0.397046	-2.27548		0.764523	0.32964
BDNF	0.0234619	1.02861		0.0608809	-0.97059		0.107961	0.322434
BEGAIN	0.0557671	0.00751102		0.58781	-0.297717		0.599209	0.22223
BEND2	0.375999	-1.08141		0.777927	0.363207		0.568204	-0.234046
BEX1	0.253434	1.85456		0.611115	-0.495325		0.926617	0.128647
BGLAP	0.756449	-1.84418		0.352079	0.243856		0.207274	-1.07678
BHMT	0.747957	0.274548		0.60504	-0.484718		0.472997	-0.072253
BHMT2	0.184948	-1.48348		0.996123	-0.534443		0.904185	0.283606
BID	0.0452646	-1.0604		0.474525	0.498484		0.126879	0.562478
BIK	0.650991	-0.21788		0.694072	0.532084		0.989144	0.246759
BIN1	0.666085	-0.519541		0.192016	1.13645		0.412127	-0.793015
BIN3	0.998273	-0.28322		0.385272	0.725973		0.594284	0.241831
BIRC3	0.00169664	-1.54686		0.752138	0.452312		0.39877	0.402349
BIRC5	0.428684	-0.763535		0.380524	-0.485558		0.553722	0.218412
BIRC6	0.495847	-0.772448		0.567547	-0.0829422		0.819521	-0.492857
BIVM	0.607956	0.343685		0.338472	-0.89308		0.12737	-0.0220942
BLK	0.161733	0.950789		0.89463	-0.421691		0.57585	0.351979
BLM	0.0383901	-2.20582		0.0301207	-3.21008		0.914403	0.289428
BLNK	0.00218122	-1.99684		0.172962	-1.12508		0.497413	0.0506891
BLOC1S2	0.389949	0.682567		0.864602	0.205379		0.965867	-0.0743208
BLOC1S3	0.17953	-1.71333		0.453737	0.304768		0.293858	0.282596
BLVRA	0.613473	-0.208796		0.187952	0.511828		0.537989	-0.219839
BLVRB	0.741703	0.0191103		0.293643	0.53994		0.680086	0.224854
BMF	0.127825	-0.842398		0.322097	0.236038		0.0959991	0.257516
BMP2	0.820822	-0.0416811		0.937871	-0.566161		0.331051	-0.701969
BMP2K	0.234241	0.639608		0.59362	-0.57853		0.47324	0.399959
BMP4	0.278699	0.639234		0.228731	-0.616731		0.184261	-1.06644
BMP7	0.0619287	0.551988		0.0785626	1.55092		0.175304	0.301188
BMPR1A	0.105222	-0.959694		0.191198	0.987175		0.0376824	0.29819
BMPR1B	0.131614	0.751874		0.119076	-1.17823		0.0329822	-0.520215
BMPR2	0.402436	0.640784		0.834768	0.535764		0.352884	-0.0603912
BMX	0.291654	-0.0941442		0.523087	0.236484		0.501697	-0.936642
BNIP1	0.00458344	-1.72098		0.597556	0.476343		0.00638965	0.736569
BNIP2	0.750941	0.365273		0.0510515	0.37737		0.0303528	0.64793
BNIP3	0.693768	-0.0643251		0.390559	0.502226		0.168132	-0.649983
BNIP3L	0.341797	-0.408792		0.595008	-0.550525		0.471053	-0.547904
BOD1	0.374939	-0.643816		0.974904	-1.16522		0.903471	-0.939639
BOK	0.602187	0.579361		0.80393	-1.386		0.731354	0.0502934
BORA	0.476599	-3.25717		0.604578	-0.501913		0.584242	-0.456317
BPGM	0.520312	-0.0337578		0.017509	1.53969		0.0738373	0.136547
BPHL	0.208683	0.387739		0.295674	-1.73111		0.410107	-0.439706
BPI	0.507876	-0.50432		0.331641	1.27063		0.0164603	0.720103
BRAF	0.0127393	-2.09726		0.000165062	2.47648		0.0711405	0.892221
BRAT1	0.0193532	-2.3308		0.0449696	1.37947		0.00235774	1.47374
BRCA1	0.00187068	-3.66125		0.206714	0.906914		0.922324	0.233005
BRCA2	0.146063	-3.75454		0.687986	0.103647		0.9554	-0.477279
BRCC3	0.138363	1.10861		0.20331	-2.93374		0.190062	-0.945337
BRD1	0.218682	1.9325		0.394107	0.310848		0.283109	0.316071
BRD2	0.296219	-0.628301		0.0990272	0.867199		0.0747503	0.468498
BRD3	0.833085	-0.348274		0.154777	0.16786		0.905345	-0.272691
BRD4	0.815928	-2.6044		0.0840947	0.865311		0.395691	-0.295131
BRDT	0.25432	-0.348856		0.00601553	-2.20828		0.413477	-0.638848
BRE	0.929284	0.233094		0.343756	-0.34664		0.291686	-0.223522
BRIP1	0.0715039	-2.6868		0.296776	-0.19753		0.0309001	-1.0373
BRMS1	0.854328	-0.269015		0.0933523	0.413799		0.380631	0.21489
BRSK1	0.859277	0.170115		0.27122	0.454765		0.435202	-0.0924897
BRSK2	0.774642	-0.121891		0.907001	0.514131		0.830269	-0.0310711
BSG	0.428349	-1.10238		0.0418707	-1.753		0.290065	0.0339231
BST1	0.624573	0.450127		0.503463	-2.2455		0.368214	0.119346
BTG1	0.629875	-0.85067		0.635314	-1.32473		0.90597	-0.200194
BTG2	0.513948	-2.25193		0.133769	-0.292957		0.6116	-0.157943
BTG3	0.0368351	-1.49217		0.649843	-0.0724504		0.333608	0.48762
BTG4	0.0799961	-1.87954		0.55835	0.628803		0.299333	0.157254
BTK	0.584051	-0.221208		0.316972	0.370746		0.116895	0.648969
BUB1	0.00451613	-1.96329		0.892729	-0.781773		0.0846147	-1.06181
BUB1B	0.519291	-1.02746		0.401262	-0.689637		0.429192	-0.466919
BUB3	0.85563	-1.20109		0.251297	1.05359		0.565951	0.454824
C10orf137	0.419228	0.354961		0.263614	-1.77777		0.305248	0.223497
C10orf90	0.180425	-1.68732		0.0402442	1.5997		0.188467	0.423359
C11orf30	0.120953	-2.35532		0.198924	0.710069		0.742656	-0.210802
C11orf82	0.861441	-0.0743583		0.739344	-0.448371		0.900348	-0.289847
C14orf169	0.109691	0.0817574		0.150637	-2.94122		0.0569657	-0.50347
C14orf178	0.514963	-0.888257		0.0120153	-1.71206		0.154794	-0.393346
C15orf41	0.0264355	-2.20172		0.00489972	2.03556		0.0239162	0.630356
C15orf57	0.41336	-0.730841		0.784152	-0.525039		0.129251	0.568308
C17orf70	0.687096	-1.40232		0.237839	0.297373		0.921926	0.193321
C17orf75	0.313228	1.10067		0.590573	-0.893186		0.840432	-0.227514
C19orf25	0.262947	-0.0433737		0.0363547	0.910051		0.445521	-0.514005
C19orf33	0.393866	0.142317		0.984493	-0.334389		0.576388	-0.358715
C19orf40	0.91647	-0.369613		0.14163	1.53164		0.642639	-0.406299
C19orf55	0.516743	0.407309		0.629877	-1.70015		0.599757	-0.46208
C19orf60	0.379831	-1.05175		0.171577	-1.50395		0.658543	0.191576
C19orf66	0.638287	-0.559695		0.35469	0.0988558		0.480816	0.0604295
C1QA	0.622068	-0.596459		0.356778	-2.31193		0.39219	0.574795
C1QB	0.103876	1.46164		0.0108043	-1.59225		0.0809119	-0.775358
C1QC	0.476385	0.640721		0.68286	0.55657		0.162958	-0.617242
C1QL1	0.306664	0.381926		0.612895	-0.829907		0.912223	0.168285
C1QTNF9	0.0775184	1.73321		0.0542798	0.969835		0.00902441	-0.721261
C1QTNF9B	0.696385	0.827612		0.00252905	1.70083		0.256919	0.866122
C1R	0.214583	-2.46976		0.763775	-0.125028		0.166555	0.313089
C1S	0.610988	0.444986		0.0406752	1.18686		0.334002	0.614707
C1orf159	0.152552	0.718101		0.0286126	0.880497		0.00272783	-0.617941
C1orf64	0.575814	0.209596		0.106856	-2.23129		0.0505426	-0.12849
C20orf96	0.808602	-0.935426		0.748362	-0.22565		0.343159	0.323772
C22orf29	0.431799	-1.33707		0.149163	-2.06844		0.444307	-0.246831
C2CD4B	0.247659	0.19335		0.363509	-1.11443		0.860216	-0.0512168
C3	0.0900341	-1.27241		0.59723	-1.07065		0.147165	-0.721571
C3orf14	0.175984	-1.13012		0.111031	-0.383065		0.372004	-0.835409
C4A	0.581789	0.246232		0.697034	-0.250992		0.104809	-0.678084
C4B	0.780375	-0.517748		0.528316	-0.556246		0.271597	-0.342265
C5	0.293366	-1.54878		0.111724	-1.58256		0.139423	-0.616669
C6orf15	0.609334	-0.294678		0.725997	-0.644174		0.735808	-0.124816
C7	0.100409	-1.1531		0.920673	-1.48001		0.480816	-0.0190343
C7orf26	0.430878	-0.700157		0.977461	-0.344889		0.292228	0.343495
C7orf31	0.140258	1.39234		0.437719	0.379214		0.467179	0.292443
C7orf43	0.473466	0.373832		0.366905	0.49311		0.993234	0.20938
C7orf50	0.046376	-1.91139		0.31961	1.06618		0.511516	-0.196585
C8G	0.486186	0.773652		0.658905	0.514154		0.367794	0.2522
C9orf96	0.687965	-0.29189		0.0967327	-1.34851		0.4791	-0.020028
CA1	0.0787099	0.328914		0.338259	-0.210972		0.131942	0.334454
CA10	0.0178564	0.692681		0.0545167	1.06174		0.0524996	-0.6532
CA11	0.685358	-0.614028		0.734883	0.442119		0.938518	0.385202
CA12	0.289192	1.47743		0.666505	-0.28703		0.574139	0.00770475
CA13	0.960294	-0.507638		0.526221	-0.527567		0.78385	-0.390464
CA14	0.593172	-0.977275		0.531203	-0.120559		0.752816	0.166695
CA2	0.836139	-0.223759		0.0225802	-1.38194		0.982536	0.50565
CA3	0.49884	0.732479		0.898435	0.470356		0.96964	-0.182328
CA4	0.763814	-0.647824		0.633012	0.0102529		0.369264	0.639753
CA5A	0.565665	0.161153		0.309471	-2.07746		0.726099	-0.726894
CA5B	0.414035	0.184216		0.015817	1.39043		0.0938145	0.59055
CA6	0.714804	-0.246976		0.273672	-0.931261		0.838274	-0.27299
CA7	0.355355	0.78804		0.357615	-1.17103		0.819828	0.117354
CA8	0.798751	0.268958		0.653496	0.614082		0.780398	-0.579965
CA9	0.107438	0.791568		0.799283	0.331283		0.527885	0.253303
CAB39	0.74292	-0.571667		0.18435	1.73443		0.170205	0.263061
CABLES1	0.200676	0.752667		0.185013	0.347236		0.559016	0.206779
CABLES2	0.419001	0.423803		0.105312	-2.61995		0.486973	0.226694
CACNA1A	0.585497	0.332244		0.164722	-1.31532		0.525672	-0.292437
CACNA1B	0.596989	1.07254		0.870278	-1.61092		0.864555	-0.368122
CACNA1C	0.458064	0.470416		0.64965	-0.875292		0.943247	0.235969
CACNA1D	0.111449	0.817184		0.886395	-0.282572		0.954552	-0.259067
CACNA1F	0.349571	0.186785		0.166386	-1.41998		0.720042	0.178853
CACNA1G	0.685939	-1.32128		0.179022	1.02083		0.549768	0.239286
CACNA1H	0.403477	-0.796069		0.224079	-1.18748		0.723916	-0.0275776
CACNA1I	0.488407	-0.228415		0.763711	-0.260579		0.317882	-0.985258
CACNA1S	0.539646	-0.326006		0.0270544	1.04974		0.298599	0.632057
CACNA2D1	0.759017	0.0684693		0.91622	-0.362572		0.729871	0.00307849
CACNA2D2	0.891844	-0.626537		0.292723	-0.691883		0.225742	-0.131067
CACNA2D3	0.207403	-0.759503		0.393663	-0.423593		0.604152	0.209362
CACNB1	0.275567	-0.65642		0.335246	-0.588482		0.274705	-0.503926
CACNB2	0.463566	-0.569811		0.600572	-0.0879915		0.221689	0.473622
CACNB3	0.681603	0.117311		0.139364	-1.10546		0.0937373	-0.318239
CACNB4	0.0672192	1.4825		0.200618	1.47173		0.128258	0.642468
CACNG1	0.49909	-0.543896		0.193797	0.307796		0.962095	0.228058
CACUL1	0.111892	1.93624		0.972667	-0.575667		0.278361	0.0793534
CACYBP	0.998273	-0.787102		0.842912	-1.64698		0.780821	-0.0783015
CAD	0.0401533	-1.8519		0.310276	-1.50801		0.848457	0.204947
CADM1	0.0713225	-1.11116		0.90968	-0.200308		0.277162	-0.601372
CADM4	0.589638	-0.273161		0.683154	-0.605952		0.921612	-0.0641256
CALCA	0.397149	-1.62907		0.243485	-1.06437		0.435666	-0.579484
CALCR	0.391469	-1.6881		0.700297	-0.426802		0.532019	-0.474257
CALM1	0.547479	0.0124366		0.902559	-1.23981		0.672012	-0.334319
CALM2	0.731614	-0.0996251		0.836333	-1.74669		0.10049	0.202787
CALM3	0.130479	-1.01111		0.865233	-0.155328		0.93603	0.0995948
CALR	0.676703	-1.57399		0.725095	0.371125		0.472024	0.167238
CALY	0.343198	0.711375		0.138402	-0.93437		0.343762	-0.285385
CAMK1	0.507624	-0.279036		0.633582	-0.267051		0.277138	-0.200175
CAMK1D	0.873208	-0.539537		0.438193	0.0492099		0.516857	0.298
CAMK1G	0.220455	-0.724828		0.247953	0.679536		0.727204	-0.275576
CAMK2A	0.955591	0.0192384		0.926446	0.0225311		0.834885	-0.339017
CAMK2B	0.978179	0.190616		0.808274	-0.739411		0.287555	-0.392783
CAMK2D	0.0479782	1.03666		0.111861	-2.04988		0.263261	0.404162
CAMK2G	0.52826	-0.714125		0.667047	-1.10159		0.377309	-0.857517
CAMK2N1	0.272804	-1.05876		0.875645	0.1305		0.467904	-0.227664
CAMK2N2	0.254484	-1.20735		0.401937	0.661388		0.336772	-0.828951
CAMK4	0.623685	-0.300864		0.514042	-1.18465		0.965553	-0.187406
CAMKK1	0.889617	-0.301846		0.185251	-1.61165		0.903855	-0.188527
CAMKK2	0.22364	-0.648562		0.014637	1.10331		0.0902708	0.503962
CAMKV	0.844157	0.228957		0.134916	1.26264		0.784456	0.0304355
CAMLG	0.446464	-0.329158		0.377642	-0.858364		0.31124	0.192391
CAMP	0.0464192	-1.9962		0.963082	-0.688401		0.633062	-0.317683
CAMTA1	0.708645	-0.374139		0.21896	0.514568		0.624383	-0.227632
CANT1	0.996703	-0.55051		0.0121662	-0.461663		0.00459177	-0.709133
CANX	0.289669	-0.06477		0.0811836	1.43512		0.0371053	0.143011
CAPN1	0.296618	1.09623		0.603575	-0.407845		0.285707	0.343872
CAPNS1	0.421952	-0.519949		0.0929301	1.11425		0.407869	0.280849
CAPNS2	0.522613	0.999075		0.944568	0.453474		0.185568	0.677348
CARD10	0.201266	0.0991862		0.23916	0.292596		0.0179056	-0.686196
CARD11	0.0419451	-1.52527		0.998483	-1.90348		0.612975	-0.139746
CARD14	0.120765	-1.73572		0.337866	-0.0584488		0.0700969	0.73848
CARD16	0.118165	1.29412		0.104072	1.62499		0.112481	0.729761
CARD17	0.120013	-1.36872		0.0726526	-0.79872		0.68965	0.0673098
CARD18	0.825722	0.599928		0.220013	-0.400519		0.559546	-0.391709
CARD6	0.612368	-0.30352		0.121455	-1.96459		0.636717	-0.874228
CARD8	0.0339185	0.922807		0.137444	-1.31109		0.0466045	0.656969
CARD9	0.648725	-0.61122		0.971069	-0.446607		0.949841	-1.2121
CARM1	0.105494	0.0822429		0.0505172	-1.65026		0.194092	0.484641
CARS	0.0260591	-2.67185		0.80331	-0.0960848		0.862385	-0.0751595
CARS2	0.555896	-0.446647		0.306729	1.16987		0.987256	0.247723
CARTPT	0.645614	0.0363426		0.487747	-0.411106		0.328701	0.236459
CASC5	0.445064	-0.433974		0.0519007	1.06766		0.0798387	0.403501
CASK	0.58449	-0.556691		0.46006	-0.148965		0.756412	-0.159932
CASP1	0.0472904	-1.36872		0.125367	-0.79872		0.0430114	-0.467011
CASP12	0.24896	0.715811		0.235416	-0.867072		0.348579	-0.300588
CASP3	0.351476	-0.847512		0.140224	-1.11847		0.948899	0.18293
CASP4	0.555896	-0.758766		0.6855	-0.937332		0.0597578	-0.7751
CASP5	0.321801	-1.36321		0.763902	0.410066		0.0124088	-0.932938
CASP7	0.479263	-0.379353		0.628276	-0.359629		0.293765	-0.611393
CASP8	0.0968594	1.20531		0.0131961	1.68617		0.047091	-0.649773
CASP8AP2	0.0471588	-2.09225		0.870949	-0.900226		0.78385	-0.418993
CASR	0.163986	-1.41683		0.307298	-0.639609		0.234937	0.619036
CAST	0.165781	0.187721		0.568905	0.338583		0.0805012	-0.36392
CAT	0.215894	0.983241		0.723293	-0.626356		0.754014	-0.117204
CAV1	0.216068	-0.847136		0.0373043	-1.04706		0.0260606	-0.552261
CBFA2T3	0.671242	-1.62526		0.302012	-0.379977		0.446822	-0.421322
CBFB	0.527231	1.37635		0.871856	-1.13224		0.383521	-0.312037
CBL	0.757519	0.510665		0.924174	-0.585762		0.271942	0.827153
CBR1	0.286989	0.606587		0.86807	-0.0905938		0.602502	-0.137365
CBS	0.583139	-0.586934		0.52596	0.273466		0.458048	0.292644
CBX4	0.534455	-0.606052		0.810137	-0.979612		0.597292	-0.232879
CCAR1	0.815623	1.16753		0.821028	-0.0267413		0.919734	0.130485
CCAR2	0.055265	-2.37655		0.0863945	-1.48445		0.0834827	0.703314
CCBL1	0.1048	-1.90824		0.801676	-0.884897		0.725132	-0.459182
CCBL2	0.610712	0.499308		0.509875	-1.51349		0.264441	0.0834518
CCDC103	0.0136262	-1.27365		0.105312	-1.15867		0.967661	-0.188579
CCDC176	0.696676	0.922689		0.0850299	0.280588		0.63222	-0.414499
CCDC6	0.962804	-0.322974		0.835494	0.668487		0.688997	-0.385317
CCK	0.33695	-0.362652		0.310881	-0.772297		0.857933	0.397727
CCKAR	0.383694	-0.615167		0.195111	-2.41399		0.170088	-0.578841
CCKBR	0.704258	-1.33413		0.029233	-1.05516		0.167888	0.0696752
CCL18	0.648725	-0.5228		0.628738	-0.521285		0.91942	-0.21612
CCL2	0.436424	0.250464		0.701485	-0.950424		0.0446757	0.390926
CCL21	0.870419	-0.780376		0.710511	0.70582		0.962095	0.0343802
CCL22	0.822352	0.114839		0.913041	-0.326433		0.31903	0.283288
CCL3	0.351476	-0.576089		0.172836	-0.955957		0.370317	-0.663044
CCL4	0.106155	-0.245811		0.43701	0.427783		0.0550899	-0.972674
CCL5	0.958413	0.586264		0.701188	1.33671		0.414379	-0.114259
CCL8	0.229443	0.445695		0.949972	-0.677455		0.994858	-0.110847
CCNA1	0.35597	1.19712		0.293275	-1.30181		0.939795	-0.47438
CCNA2	0.344201	-0.506413		0.522827	-0.946664		0.743252	0.0151416
CCNB1	0.0650142	-0.479619		0.0769889	-2.08235		0.0607684	-1.80784
CCNB1IP1	0.364313	-0.431544		0.0728548	-1.78756		0.37814	-0.30278
CCNB2	0.0474663	-3.17633		0.1396	0.520288		0.0144185	-1.13686
CCNB3	0.188348	-2.04772		0.641049	-0.520333		0.383121	0.155561
CCNC	0.49884	-1.09471		0.299553	0.443537		0.0127302	0.681345
CCND1	0.515726	-1.30221		0.728526	0.404599		0.19217	-0.431328
CCND2	0.444583	-1.3341		0.565403	-1.40013		0.442858	-0.24331
CCND3	0.688545	-0.820006		0.0840947	-1.4898		0.349816	0.0460528
CCNE1	0.558275	0.139732		0.0466882	1.01623		0.430113	0.172325
CCNE2	0.294174	-1.31875		0.372464	-1.43071		0.658828	0.192493
CCNF	0.721378	-1.09511		0.98659	-0.778639		0.126674	0.413241
CCNG1	0.569173	-0.88982		0.871856	0.234278		0.896602	-0.147271
CCNG2	0.408434	0.487021		0.156997	-1.28208		0.42323	-0.234535
CCNH	0.875999	0.109218		0.125161	-1.41671		0.322876	-0.589142
CCNI	0.602736	-1.04901		0.0106195	0.0881785		0.99229	-0.306831
CCNJ	0.721866	0.991851		0.415805	0.170141		0.315975	0.207451
CCNK	0.412013	-0.409301		0.403966	-1.4594		0.603327	-0.164032
CCNL1	0.443181	-1.37509		0.411227	-1.05145		0.898787	-0.158883
CCNO	0.0658195	-1.16363		0.289062	-2.80915		0.148712	-0.22428
CCNT1	0.52826	0.752187		0.425283	0.64922		0.606354	-0.408305
CCNT2	0.206978	-1.62285		0.47848	-0.868184		0.787792	0.246165
CCNY	0.073002	-2.32071		0.156769	-2.05444		0.583809	-1.11817
CCP110	0.0348566	-0.574428		0.144255	1.49132		0.445718	0.273744
CCPG1	0.302585	0.627688		0.10969	-0.890397		0.643487	-0.105966
CCR1	0.562515	-0.468669		0.974264	0.114173		0.790829	-0.0714616
CCR5	0.0187294	-1.88504		0.269501	1.37752		0.189588	-0.643094
CCT3	0.78733	-0.965093		0.692969	-0.901473		0.145521	0.497447
CCZ1	0.739325	-1.98448		0.400813	1.28968		0.562204	0.395521
CCZ1B	0.660373	-1.09516		0.69911	-0.697449		0.606354	0.130633
CD109	0.386918	1.01237		0.127447	0.154389		0.145194	0.678267
CD160	0.382828	-0.92955		0.0622207	1.13736		0.64754	-0.060904
CD180	0.983516	-0.521525		0.0899296	1.09948		0.457809	0.135745
CD19	0.87724	1.12792		0.672887	0.420145		0.706285	-0.193177
CD1A	0.608782	-1.06238		0.917492	0.499536		0.599483	0.611766
CD1D	0.176992	1.3997		0.922582	0.298638		0.456139	-0.172191
CD2	0.190447	1.24067		0.324384	1.27144		0.462121	0.229277
CD209	0.311343	0.738302		0.150296	0.319142		0.738485	-0.0326378
CD247	0.440145	-0.689423		0.0129261	-1.59537		0.0728117	-0.968866
CD27	0.304806	-0.115984		0.399691	-1.65581		0.770547	0.0585845
CD28	0.926157	-0.450871		0.334228	0.04295		0.0694283	-0.941801
CD2AP	0.327602	-2.4927		0.901646	-0.703417		0.318812	-0.326569
CD33	0.622068	-0.486753		0.225334	-0.579263		0.307112	0.415096
CD36	0.359428	0.436407		0.460527	0.181637		0.513998	-0.2024
CD38	0.994819	-0.189381		0.275222	-1.07834		0.408987	0.460202
CD3D	0.525689	-0.72201		0.0365363	0.99339		0.0300823	0.728004
CD3E	0.748554	-0.686639		0.242975	-1.00747		0.623546	-0.867751
CD3G	0.746169	-1.05468		0.572869	0.183844		0.915393	0.109974
CD4	0.144758	0.678864		0.421106	0.281564		0.583137	0.294816
CD40	0.283566	0.493289		0.88094	0.676944		0.835141	0.145616
CD40LG	0.419544	-0.865883		0.806907	-0.176488		0.119077	-0.647145
CD44	0.180258	-1.60322		0.329806	-0.481926		0.190259	-0.547272
CD46	0.743489	-0.956564		0.917174	-0.700032		0.443603	0.14265
CD5	0.139414	1.0938		0.712509	0.136235		0.975616	-0.582457
CD52	0.0241183	0.813485		0.869963	-0.736794		0.0393465	0.764067
CD55	0.094136	-1.065		0.0869305	0.940015		0.0405083	0.59213
CD5L	0.565706	-0.164633		0.733226	0.496126		0.972785	0.155402
CD70	0.293631	0.1604		0.612614	-0.428804		0.683558	-0.379395
CD79A	0.920531	-0.108764		0.644754	0.716422		0.404971	0.0263759
CD80	0.601639	-1.20153		0.582686	-1.02006		0.0184362	-1.28504
CD86	0.309841	-0.434197		0.841971	0.146212		0.223784	-0.565281
CD9	0.0858821	0.464775		0.0733283	0.984929		0.951095	-0.114758
CD99	0.299092	-0.319136		0.0644452	-1.72258		0.847839	0.287876
CDA	0.480292	-0.541176		0.577768	-0.59416		0.644053	-0.164957
CDAN1	0.00356781	-2.23203		0.441543	-0.856851		0.0424219	-0.134747
CDC123	0.742298	-0.559714		0.154893	-1.12879		0.846604	0.163738
CDC14A	0.656386	-0.260715		0.209644	0.545382		0.515074	0.428499
CDC14B	0.327213	0.571896		0.50142	0.417069		0.487715	-0.480495
CDC16	0.00381357	-1.87409		0.153965	1.20131		0.848766	0.0279133
CDC20	0.333982	-4.23006		0.0775898	2.56985		0.672875	0.266625
CDC23	0.84833	0.0228721		0.637748	-0.469913		0.419913	-0.80691
CDC25A	0.758717	0.529249		0.241684	-3.03141		0.320373	-1.56745
CDC25B	0.890288	0.538518		0.0544305	-2.98383		0.0903123	-0.840342
CDC25C	0.727473	-0.229251		0.626604	-0.312402		0.768934	0.322401
CDC26	0.130679	-0.41236		0.388351	-2.3778		0.161182	-0.810327
CDC27	0.513308	0.0719014		0.552909	-0.885787		0.305083	-0.452171
CDC34	0.811042	0.222443		0.871225	-0.485593		0.551348	-0.0574054
CDC37	0.554491	0.987128		0.221513	-0.676862		0.168013	-0.207755
CDC37L1	0.452532	0.372911		0.973879	-0.0610336		0.674027	-0.313833
CDC42	0.0693646	-1.2206		0.124535	1.02855		0.209127	0.431546
CDC42BPA	0.358642	-0.773121		0.0268331	-1.25365		0.181539	-0.589826
CDC42BPB	0.650141	0.777761		0.156527	-1.07767		0.168863	-0.478636
CDC42BPG	0.910851	-1.0067		0.343961	0.637928		0.963981	0.260185
CDC42SE2	0.687965	-0.814058		0.0677457	-1.40065		0.0176863	-0.748141
CDC45	0.411228	-0.202274		0.758101	-0.109466		0.260577	-0.379218
CDC5L	0.252745	-2.08763		0.720523	-1.65596		0.754975	-0.244203
CDC6	0.472753	-1.96639		0.250742	-0.48328		0.0626332	-0.45098
CDC7	0.333638	0.478249		0.712384	-0.267395		0.251828	0.27208
CDC73	0.977238	-0.334473		0.657456	0.34564		0.171566	0.150293
CDCA2	0.882518	-0.778632		0.0999131	-2.42536		0.47959	-0.492185
CDCA3	0.131684	-1.63496		0.067302	-2.40813		0.00371491	-1.25799
CDCA5	0.851556	0.847403		0.841768	-0.308467		0.993864	-0.179675
CDCA8	0.240729	-0.924722		0.0639261	-0.135724		0.02251	0.752072
CDH1	0.981004	-0.584956		0.904781	-0.348637		0.759413	-0.0992965
CDH11	0.83155	-0.365143		0.275079	0.31695		0.840123	0.0964053
CDH13	0.17212	-0.994467		0.676107	-0.747964		0.266812	-0.127839
CDH2	0.700755	-0.0430791		0.0691258	1.86926		0.491433	0.117587
CDH4	0.866702	-0.248937		0.0352273	1.17407		0.583408	0.0404864
CDH5	0.863607	0.365677		0.64792	0.695505		0.811865	0.0579204
CDIP1	0.0751105	0.937754		0.0593738	1.70465		0.375233	0.335568
CDIPT	0.0856452	-1.38833		0.107132	-1.36355		0.427352	0.23509
CDK1	0.0448012	-2.34227		0.339329	-1.16719		0.703064	-0.513961
CDK10	0.840156	0.732986		0.79248	-0.634899		0.577735	0.0496533
CDK11A	0.44529	-0.607089		0.533571	1.38483		0.0927373	0.530738
CDK11B	0.0929701	-2.61403		0.329416	-0.560864		0.101483	-0.566377
CDK12	0.0828242	-0.735631		0.313932	-0.717455		0.00615298	0.628954
CDK13	0.00430887	-1.58859		0.382719	-0.150321		0.651708	-0.250278
CDK14	0.0608914	0.42569		0.325491	0.851819		0.973099	-0.0981971
CDK15	0.534714	0.209842		0.181714	-1.20992		0.729574	-0.137878
CDK16	0.41336	-0.382448		0.0208817	0.227244		0.0384144	0.699801
CDK17	0.440611	-0.381788		0.70684	-0.769409		0.651708	-0.239338
CDK18	0.885314	-0.326436		0.230902	-1.27002		0.754014	-0.151114
CDK19	0.0403065	1.24724		0.446763	0.352781		0.671724	-0.248882
CDK2	0.117779	-1.3665		0.486491	-1.3934		0.0488575	-0.14259
CDK20	0.821128	-0.569684		0.962762	0.0682157		0.50318	-0.110656
CDK2AP1	0.366108	-0.625208		0.851031	-0.924631		0.412352	-0.341269
CDK3	0.0340413	1.26223		0.0472215	2.21587		0.0600403	0.79738
CDK4	0.463566	-0.762681		0.73383	0.303954		0.598661	0.0963352
CDK5	0.192627	0.408935		0.590573	-0.248003		0.316356	0.411658
CDK5R1	0.21502	-1.60033		0.803964	0.562371		0.50318	-0.147507
CDK5R2	0.193434	-0.995237		0.811818	-0.778641		0.880399	-0.391404
CDK5RAP2	0.156374	-1.49463		0.00632518	-2.38339		0.96964	0.400972
CDK6	0.178893	-0.755994		0.788159	0.372806		0.501923	-0.19371
CDK7	0.573185	-0.377116		0.231058	-0.897765		0.305807	0.175996
CDK8	0.61818	0.269519		0.20979	-2.29894		0.200674	0.0165313
CDK9	0.269889	0.419712		0.099254	0.395743		0.820748	-0.0661301
CDKL1	0.19957	-1.57319		0.397452	0.252629		0.437992	-0.294005
CDKL2	0.0515711	-0.879907		0.0948954	-1.25099		0.244554	-0.285919
CDKL3	0.638849	-0.36684		0.0466151	-1.78086		0.196133	-0.594962
CDKL4	0.521366	0.266981		0.848541	-0.855549		0.454293	-0.38115
CDKL5	0.307783	-1.008		0.090615	0.420406		0.973414	-0.0984289
CDKN1A	0.651558	-0.179071		0.152122	0.392887		0.206707	-0.229771
CDKN1B	0.320266	-0.643232		0.793716	0.222937		0.718044	0.0192257
CDKN1C	0.379618	-0.451399		0.917174	-0.374139		0.74057	-0.278679
CDKN2A	0.33308	0.579166		0.257252	-0.955086		0.118251	-0.821008
CDKN2B	0.843234	-0.314699		0.352403	0.196413		0.641792	0.187572
CDKN2C	0.164463	-1.0529		0.67904	-1.04062		0.496663	0.356691
CDKN2D	0.0053017	-3.0034		0.265672	-0.0550794		0.0177809	-0.966011
CDKN3	0.187701	-2.93661		0.585271	-0.575024		0.648868	-1.43336
CDO1	0.978179	-0.897476		0.563751	-0.398636		0.799957	0.47633
CDPF1	0.573721	-0.164062		0.615993	-1.75426		0.610218	-0.207857
CDR1	0.919594	-0.273758		0.594452	-0.299458		0.108578	-0.588047
CDR2	0.0164981	-2.06879		0.908592	-0.565037		0.678353	0.462579
CDT1	0.666943	-1.16811		0.241272	-0.651461		0.79326	0.193289
CDX2	0.621234	1.00999		0.493293	-1.09422		0.507212	-0.153011
CEACAM1	0.0381698	0.537748		0.348887	0.472954		0.90597	0.294843
CEACAM5	0.809212	0.187343		0.194899	1.49206		0.15942	0.248333
CEBPA	0.278524	0.501855		0.895264	-0.39696		0.368634	-0.35772
CEBPB	0.72511	-0.1443		0.481735	-2.81376		0.913787	-0.471484
CEBPG	0.675264	-0.817775		0.651959	0.561362		0.508925	-0.10402
CEL	0.975982	-0.52156		0.276315	-0.871996		0.453046	-0.2251
CELA1	0.0292813	-1.10555		0.445806	-1.36855		0.5646	-0.642677
CELA2A	0.62405	-0.246402		0.646737	0.32332		0.623925	-0.622042
CENPE	0.0133639	-3.89599		0.927601	0.20316		0.534108	0.112693
CENPF	0.405762	-0.372648		0.51271	-0.51417		0.0695495	-0.718274
CENPI	0.0173876	-4.08431		0.923899	-0.83129		0.332069	0.912384
CENPJ	0.321417	1.3185		0.490516	0.708047		0.187013	0.531871
CENPL	0.91647	-0.677587		0.46006	2.27703		0.397449	0.10933
CENPM	0.0523789	-3.01992		0.526374	-1.94071		0.267322	0.34329
CENPN	0.959354	0.873868		0.485488	-0.515867		0.934148	-0.432884
CENPQ	0.0332617	-2.25815		0.156293	-2.11413		0.0576892	-0.834801
CENPU	0.00332386	-2.29416		0.351536	-1.18588		0.726908	-0.43023
CENPV	0.266826	0.933807		0.619098	-0.623755		0.7275	-0.22031
CEP128	0.042104	1.25046		0.0594944	1.26117		0.127567	0.0371787
CEP135	0.0166048	-2.76321		0.352232	1.0907		0.935872	0.204586
CEP152	0.0512885	-1.5605		0.40986	-1.51453		0.609113	-0.445489
CEP192	0.162678	-1.22783		0.0058486	-1.96153		0.299517	-0.807439
CEP250	0.674689	-0.258914		0.482734	0.552969		0.260577	0.102182
CEP290	0.368638	1.03501		0.0788183	-1.17632		0.488957	-0.272345
CEP350	0.541469	-0.817974		0.966596	-0.501198		0.241688	-0.870374
CEP41	0.365899	0.553495		0.293643	0.295592		0.604427	-0.115216
CEP55	0.508128	0.589322		0.624194	0.708176		0.245515	-0.0529444
CEP57	0.719215	-1.60446		0.673472	0.399417		0.463563	-0.14752
CEP63	0.66957	0.521148		0.836154	-0.489345		0.866757	0.0963344
CEP68	0.401331	-0.687409		0.785384	0.599908		0.227864	0.181683
CEP70	0.740514	0.0816676		0.416264	1.29295		0.364447	0.0961205
CEP72	0.567838	0.31975		0.37182	-1.14756		0.272286	0.59879
CEP76	0.644077	-1.23197		0.734216	-0.230436		0.813455	1.07088
CEP78	0.480486	-0.299939		0.535059	-0.439458		0.104793	-0.497565
CERK	0.313605	-1.05624		0.45664	-1.13045		0.809113	-0.124599
CERKL	0.312661	-0.366196		0.0887214	0.616132		0.139404	0.445959
CES1	0.383436	-0.333085		0.355776	-0.400229		0.0227732	-0.62096
CES3	0.614303	0.220372		0.459067	-0.592039		0.13585	-0.555028
CES5A	0.307969	1.03024		0.777078	0.404902		0.433811	0.257382
CETN1	0.0141593	-2.55718		0.836154	0.318896		0.731057	-0.476002
CETN2	0.561985	-0.573531		0.471559	-1.05933		0.0536559	-0.879705
CETN3	0.0536837	1.12387		0.722692	-0.90981		0.618533	-0.680221
CFB	0.370087	-1.51793		0.0598201	0.732964		0.493173	-0.298283
CFD	0.45497	0.181237		0.62221	0.397345		0.605803	0.321943
CFL1	0.110391	-1.13325		0.640161	-0.627465		0.882266	-0.0357007
CFP	0.629316	-0.614894		0.0784946	-0.559462		0.222435	0.361541
CFTR	0.0868708	0.800782		0.279866	0.690717		0.834885	-0.115202
CGA	0.534455	-1.06364		0.283294	1.40257		0.119308	-0.600703
CGB	0.244295	-0.415811		0.426447	0.365045		0.832422	0.21838
CGB5	0.823577	0.042422		0.631586	0.599443		0.0308389	0.575834
CGREF1	0.749747	0.20155		0.426447	-0.916008		0.11015	-1.06564
CGRRF1	0.379831	-1.62809		0.573536	-0.477569		0.363822	0.37208
CHAF1A	3.05602e-05	-2.05295		0.160978	-0.889151		0.0320899	-1.65128
CHAF1B	0.319883	-1.98209		0.729479	-0.615016		0.653828	-0.0141355
CHAT	0.184687	-1.69501		0.251966	-0.599049		0.212028	-0.55397
CHD1	0.413234	-0.300319		0.109997	-2.48165		0.784281	-0.156995
CHD8	0.0947915	-1.34198		0.0261244	1.11375		0.385166	-0.135677
CHD9	0.209253	-0.524491		0.561468	0.55515		0.0802964	0.405229
CHEK1	0.593445	0.123297		0.0709848	0.588517		0.0335348	0.520819
CHEK2	0.0437629	-1.22193		0.0127149	1.34542		0.0092029	0.615435
CHFR	0.355765	-0.640748		0.718793	0.649752		0.232923	0.183351
CHI3L1	0.398907	0.506635		0.00133384	-1.79481		0.114521	-0.309851
CHIA	0.747361	1.49203		0.0871723	-2.93635		0.22665	-0.371292
CHIC2	0.670381	0.877594		0.148148	0.773285		0.807585	0.796802
CHIT1	0.73992	-0.249126		0.313222	0.808566		0.400315	0.383921
CHKA	0.105262	1.44753		0.130419	-1.6054		0.103183	-1.00474
CHKB	0.115214	0.77287		0.601129	0.331044		0.445012	-0.119478
CHL1	0.71745	-0.654764		0.558081	0.194902		0.404081	-0.656548
CHM	0.466933	0.299952		0.923537	-0.576756		0.955495	0.231821
CHN1	0.348028	-1.39325		0.435121	-0.429444		0.258079	-0.226405
CHP2	0.654396	-0.131941		0.480488	-2.27973		0.453283	0.319724
CHPF	0.0521879	-1.59668		0.27	-0.342371		0.552139	-0.179409
CHRFAM7A	0.747063	-0.119262		0.887028	0.540788		0.16559	0.133867
CHRM1	0.663797	0.296553		0.601129	0.066074		0.974358	0.0931539
CHRM2	0.622902	-0.622095		0.465902	-0.29916		0.361327	0.0218591
CHRM3	0.200953	0.529259		0.290523	0.304975		0.313318	0.193466
CHRM4	0.829709	-0.466625		0.245084	-1.25555		0.106938	-0.271875
CHRM5	0.640537	-0.557202		0.114393	-2.28114		0.685586	-0.349539
CHRNA1	0.508885	0.206268		0.112566	1.36874		0.885068	0.184563
CHRNA10	0.393212	0.120678		0.331486	1.57737		0.0802283	0.639887
CHRNA2	0.316838	0.257867		0.473251	-0.411548		0.0406061	-1.03434
CHRNA3	0.543034	-0.509937		0.907957	-0.744302		0.532536	-0.258224
CHRNA4	0.769223	-0.770154		0.407814	-0.556832		0.818908	-0.372301
CHRNA5	0.665947	-0.480704		0.298736	-0.585401		0.818908	-0.152386
CHRNA6	0.520312	-0.979318		0.272795	0.132102		0.905345	0.229946
CHRNA7	0.05195	-1.74367		0.331441	1.43615		0.781729	0.00594184
CHRNA9	0.931474	-0.0621296		0.507049	0.324507		0.921299	-0.00388176
CHRNB1	0.981632	0.285549		0.522827	0.156728		0.676333	-0.184204
CHRNB2	0.256788	-1.576		0.0262054	1.03509		0.44126	0.271942
CHRNB3	0.255163	-1.13384		0.272074	-1.05787		0.0916552	-0.601644
CHRNB4	0.635197	-0.830616		0.348681	-0.774269		0.666267	-0.389161
CHRND	0.631834	-0.272747		0.841971	0.235378		0.767232	-0.191536
CHRNE	0.323149	0.623111		0.397675	-0.38895		0.49392	-0.333301
CHRNG	0.567913	-1.26237		0.308467	-0.446491		0.0969478	0.694187
CHST1	0.699297	0.204372		0.718793	0.513521		0.751918	-0.307454
CHST12	0.672965	-0.66386		0.673428	-0.548526		0.655122	0.226492
CHST13	0.993563	-0.571296		0.008775	-2.11942		0.0467272	-0.602186
CHST14	0.350257	-0.703385		0.39433	0.331484		0.35003	0.223966
CHST4	0.276913	-0.932779		0.415805	-1.49205		0.733287	-0.291733
CHST6	0.0336874	-1.52635		0.0835885	-0.710674		0.0294885	-1.44907
CHST7	0.599723	-0.495696		0.25919	0.345272		0.0880854	0.82896
CHSY3	0.903366	0.256472		0.350125	0.383142		0.610771	-0.0674719
CHUK	0.697258	-1.11072		0.837272	-0.603311		0.647167	-0.6029
CIB1	0.103625	0.449544		0.750489	1.85519		0.338362	0.513872
CIB2	0.269467	-2.32319		0.541106	-0.977159		0.141741	0.691939
CIB3	0.135971	-0.396252		0.141197	0.0182466		0.0142772	0.737611
CIC	0.114218	0.130981		0.0475349	-2.64327		0.263598	-1.0009
CIDEA	0.113229	0.408392		0.413741	-0.0330234		0.198739	0.316514
CIDEB	0.447875	-2.20079		0.503208	0.341098		0.899411	0.207621
CIDEC	0.0374433	1.31316		0.374616	0.67704		0.315404	-0.203927
CIITA	0.604108	-0.458684		0.982575	0.834952		0.768136	0.382061
CILP2	0.744382	-0.187776		0.668505	-0.408892		0.786579	-0.823019
CINP	0.388431	-0.858027		0.326477	0.451147		0.367374	0.276294
CIT	0.00561913	-2.56594		0.335045	-2.08754		0.0712642	1.07656
CITED2	0.0525179	-1.12314		0.232177	0.594227		0.779095	-0.268371
CKAP2	0.150704	-0.151723		0.489256	0.462515		0.0117479	0.508239
CKAP5	0.0870885	-0.963168		0.443419	0.701879		0.113438	-0.544604
CKB	0.603029	-0.257273		0.545864	-0.407058		0.706843	-1.32963
CKM	0.966254	-0.750189		0.418105	-2.43973		0.12425	-0.71607
CKMT1A	0.0622593	-1.94284		0.143143	0.475182		0.170703	0.312509
CKMT1B	0.612368	-0.0402689		0.352403	-0.149317		0.101557	-0.74586
CKMT2	0.936168	-0.678129		0.95063	-0.616704		0.732244	0.261738
CKS1B	0.412013	-0.964816		0.123395	-1.30934		0.107281	-0.304706
CKS2	0.769223	-0.765128		0.522305	0.31924		0.991661	-0.203575
CLASP1	0.31721	-1.99855		0.331907	-0.674415		0.136539	-0.771315
CLASP2	0.0599807	-0.951292		0.154581	-0.769479		0.0477651	-0.476421
CLASRP	0.0495743	-1.94164		0.346856	-1.14707		0.0174797	0.536653
CLC	0.819292	0.0779679		0.195451	1.97665		0.604427	-0.295248
CLCN2	0.879102	-0.452934		0.866178	-0.916909		0.662544	-0.282122
CLCNKA	0.867941	-0.482574		0.559159	-0.564298		0.1259	0.828507
CLDN3	0.612644	-0.282708		0.900338	-0.913679		0.927251	-0.448723
CLDN4	0.0719382	-2.85713		0.132701	-1.03895		0.245909	-0.348636
CLDN5	0.407988	0.385504		0.288516	0.686884		0.669424	-0.317147
CLEC2B	0.0137767	-1.1511		0.0828042	-2.2063		0.723949	-0.111299
CLEC3B	0.33544	-0.30889		0.236052	0.404862		0.519383	-0.00925455
CLGN	0.129802	-0.408753		0.0331685	0.901165		0.0203932	0.600378
CLIC2	0.948695	-1.24289		0.372331	0.71223		0.460441	0.434507
CLIC5	0.267504	-0.0648861		0.380683	0.457385		0.34336	-0.76127
CLIC6	0.342197	-1.12216		0.858619	-0.471038		0.509741	-0.708124
CLK1	0.94243	0.425755		0.725095	-1.39376		0.251661	0.115836
CLK2	0.263367	0.576924		0.105516	0.622992		0.160501	0.282207
CLK3	0.670955	0.436231		0.339484	-0.398716		0.698387	-0.220903
CLK4	0.644202	0.467499		0.991207	0.41101		0.53825	-0.458997
CLP1	0.279672	-2.47193		0.145816	-1.25174		0.0769532	0.667218
CLPB	0.849705	-2.33909		0.429249	-1.7277		0.736403	0.367189
CLPP	0.811653	-0.124088		0.373755	0.315279		0.374545	0.0202546
CLPS	0.743191	0.198037		0.437483	-1.29175		0.563535	0.0264442
CLPX	0.251706	-1.55829		0.401937	1.2949		0.172557	0.388926
CLSPN	0.410221	-0.916612		0.129056	0.87442		0.0774079	0.650695
CLTC	0.223883	-3.10234		0.978724	-0.523641		0.271254	-1.32294
CLTCL1	0.752981	0.166466		0.977922	0.2594		0.90472	-0.279074
CLU	0.0161644	1.28572		0.00767637	-0.830184		0.808502	-0.238352
CLYBL	0.257946	-1.74187		0.297157	-2.12159		0.149824	-0.293532
CMA1	0.247468	-0.543382		0.137238	1.20779		0.68961	-0.317441
CMAS	0.114399	0.286814		0.0374808	1.28333		0.686166	-0.261323
CMBL	0.070336	1.15557		0.311494	-1.15622		0.150047	-0.180545
CMPK1	0.339404	-0.727802		0.27862	-1.85062		0.698387	-0.731747
CMYA5	0.943682	-0.0842457		0.722992	0.567227		0.792956	-0.477146
CNBP	0.748256	-0.0944013		0.00429641	1.09102		0.224987	0.186447
CNKSR1	0.510654	-0.386526		0.729308	0.585644		0.379872	0.134057
CNKSR2	0.373881	-1.60546		0.0746263	-1.59825		0.732541	-0.0236099
CNKSR3	0.130579	0.896934		0.669673	-0.455342		0.0609857	0.670408
CNOT2	0.742893	-0.0997349		0.0483488	-2.23715		0.890676	0.29447
CNOT6L	0.502595	-1.05124		0.919082	-0.107558		0.794781	0.248863
CNOT8	0.139742	-1.85094		0.444456	-0.396847		0.0196362	-0.561475
CNP	0.829709	-0.673061		0.843225	-0.565947		0.552139	0.302546
CNPY4	0.196847	-1.72294		0.732974	-0.311676		0.984574	0.170765
CNR1	0.13721	0.671733		0.0445981	0.873701		0.0999868	0.400818
CNR2	0.124384	-1.08774		0.802003	-1.1964		0.155067	-1.08377
CNTF	0.600818	-0.779555		0.318609	0.0356203		0.684717	0.654971
CNTN1	0.440884	0.231783		0.02184	0.693742		0.32124	-0.261726
CNTN3	0.261774	-1.11535		0.456987	-0.983441		0.0461208	-1.35972
CNTN4	0.216187	-0.97821		0.364145	-0.197543		0.303391	-0.793943
CNTN5	0.641402	-0.352773		0.324799	-1.27146		0.0938145	-0.831577
CNTN6	0.135352	-1.37114		0.880069	-0.517579		0.188865	-0.893203
CNTRL	0.249758	-0.481175		0.0972167	0.250857		0.754314	-0.312638
CNTROB	0.23486	-1.05629		0.847618	-0.947351		0.115157	0.871768
COASY	0.0250214	-1.4957		0.30901	0.00865424		0.659685	-0.334137
COCH	0.889666	0.24581		0.819782	1.04529		0.352475	-0.0816015
COL11A1	0.62513	-0.300665		0.876593	-0.943144		0.992605	0.420139
COL18A1	0.496345	0.15897		0.687572	-1.18227		0.197501	-0.215288
COL19A1	0.0724998	-1.14079		0.592789	-1.10824		0.809724	0.347888
COL1A1	0.243499	0.44507		0.746844	-0.936766		0.215781	-0.301474
COL1A2	0.235015	-1.15607		0.426447	-0.559875		0.635872	0.520611
COL2A1	0.349648	-0.600728		0.519183	-1.29119		0.619924	-0.357687
COL3A1	0.205988	2.53043		0.121648	1.3464		0.372004	-0.0167437
COL4A1	0.383687	-0.48286		0.575174	-0.57946		0.551875	-0.0939372
COL4A2	0.429267	-1.32022		0.390338	-0.342325		0.885379	-0.357262
COL4A3	0.361534	-1.50518		0.41205	0.495615		0.354111	-0.163745
COL4A4	0.394959	-2.52366		0.723776	-0.67918		0.577735	-0.0385907
COL4A6	0.927408	-0.236332		0.113568	-0.282456		0.997955	-0.228052
COL5A1	0.607681	0.403223		0.229035	-1.47858		0.353039	-0.213301
COL5A3	0.0791856	-1.3032		0.554316	-0.416503		0.788703	-0.336404
COL6A2	0.431569	-1.3996		0.518958	0.722369		0.589378	0.204393
COL7A1	0.0941372	1.34536		0.615147	-0.667375		0.993549	-0.0278837
COL9A3	0.762135	-0.349494		0.758882	-0.395897		0.309615	-0.839565
COMMD1	0.15892	0.836325		0.208917	0.523515		0.917229	-0.411552
COMMD4	0.0891111	-1.78994		0.289982	1.73154		0.0562914	0.726624
COMMD5	0.127306	-0.868878		0.251778	-2.81796		0.945131	-0.151537
COMP	0.59154	0.211753		0.415346	0.643878		0.858667	-0.262742
COMT	0.121463	-1.66516		0.0657217	-1.483		0.244824	-0.333544
COMTD1	0.0103538	-0.425387		0.992166	-0.2703		0.967753	0.307278
COPS2	0.372248	-0.385542		0.637425	-1.8904		0.0780707	-0.772565
COPS5	0.493723	-0.331177		0.0492847	0.340565		0.0121719	0.603467
COQ6	0.811042	-0.852003		0.886276	0.587001		0.028876	-0.793866
CORO6	0.196144	-2.56624		0.191064	-1.16203		0.716865	0.776849
COX19	0.688255	-1.5424		0.93585	-0.0498913		0.512023	-0.328381
COX4I1	0.82419	0.134095		0.0441397	1.1787		0.783547	-0.202448
COX5A	0.0838682	-1.62725		0.0773453	0.601486		0.809724	-0.128895
COX5B	0.0804721	1.50293		0.43465	0.571127		0.825659	0.16493
COX6A2	0.493609	-0.922104		0.00950192	1.98205		0.157326	0.696179
COX6B1	0.455207	-0.960566		0.660356	-0.584574		0.259743	-0.111647
COX6C	0.184166	0.934972		0.128149	1.39136		0.272631	-0.697584
COX7A1	0.192224	1.18674		0.379813	-0.913221		0.157673	-0.116865
COX7B	0.155571	-1.46309		0.719692	0.583628		0.125998	0.78705
COX7C	0.958726	-0.0355236		0.953503	-1.9567		0.181797	-0.197312
COX8A	0.811042	0.1985		0.888279	0.0048473		0.912754	-0.113202
CP	0.339198	-2.49432		0.251545	-2.3496		0.763033	-0.730485
CPA1	0.662084	0.186552		0.760847	-0.265595		0.701601	0.0325494
CPAMD8	0.0450535	-1.37982		0.760169	-0.0250549		0.323262	0.123917
CPB1	0.193839	-1.09299		0.835081	-0.399418		0.177702	-0.64625
CPD	0.421725	-0.818067		0.584776	-1.69896		0.425975	0.234094
CPE	0.759017	0.488311		0.5823	0.34713		0.58965	-0.105869
CPNE8	0.445055	-0.0276869		0.648785	-0.396283		0.576388	-0.575349
CPO	0.70806	-0.374104		0.144917	0.321305		0.143676	-1.20988
CPS1	0.140258	-1.64762		0.554048	0.389966		0.53851	0.367249
CPT1A	0.203256	-1.33945		0.359341	1.12246		0.632781	0.162126
CPT1B	0.0414682	-1.27883		0.216056	0.959535		0.0632502	0.786316
CPT2	0.182353	1.23735		0.867755	-0.148475		0.674603	-0.462581
CRAT	0.534197	-0.0786781		0.915902	-1.11109		0.246639	0.105103
CRB2	0.659802	0.192826		0.712808	0.636168		0.746535	0.119578
CREB1	0.222836	-0.886229		0.463455	0.458872		0.264441	-0.236794
CREBBP	0.0385007	-1.17724		0.419258	-1.34512		0.0321151	-0.746719
CRH	0.132594	-1.50411		0.192153	-1.46423		0.341155	-0.264962
CRISPLD1	0.187438	0.918637		0.140656	-0.877164		0.608837	-0.147228
CRK	0.350663	0.385993		0.296601	1.11176		0.618533	0.188554
CRKL	0.345205	-0.508121		0.180929	1.70548		0.193417	0.358538
CRNKL1	0.558804	-0.661548		0.843751	-0.213918		0.743849	-0.0239092
CROCC	0.996193	0.0873955		0.659604	0.712465		0.434506	-0.597922
CROT	0.839848	-1.02003		0.949972	-0.362331		0.646883	-0.053952
CRP	0.797036	-1.18214		0.343187	0.518534		0.147606	-0.449506
CRTC1	0.022258	-1.10033		0.111244	1.19098		0.0273785	1.24575
CRYBB1	0.614579	0.126519		0.330644	-1.39612		0.836733	-0.537228
CRYL1	0.620123	-0.149504		0.867755	-1.24823		0.842282	0.343426
CRYZ	0.0802678	-2.00149		0.22854	-1.98419		0.0259221	0.623298
CS	0.521079	-0.157139		0.608681	-1.16373		0.675467	-0.421554
CSAD	0.181875	0.719674		0.258601	0.484379		0.0943567	0.739386
CSAG2	0.720687	-0.683047		0.138829	-2.01346		0.397009	0.694034
CSF1	0.0882611	-1.55678		0.257536	0.483634		0.0676148	-0.691041
CSF1R	0.77796	-0.617688		0.0447762	0.0303832		0.677487	-0.125533
CSF2	0.489395	-0.696219		0.576268	0.451824		0.652276	-0.267907
CSF2RA	0.144975	0.471336		0.671425	0.376523		0.359876	-0.166185
CSF2RB	0.188891	0.362465		0.383958	0.423599		0.815232	0.168418
CSF3	0.70806	1.21869		0.00895191	-1.28822		0.0297841	-1.1574
CSF3R	0.649741	-0.471306		0.0729898	0.706271		0.414485	0.315236
CSGALNACT2	0.0696669	1.17981		0.794025	0.566849		0.255267	0.306697
CSK	0.0700921	-1.46814		0.239116	0.382967		0.157673	-0.195652
CSMD3	0.996075	0.227268		0.38725	0.334974		0.4892	0.427811
CSNK1A1	0.0614355	-2.13078		0.979944	0.395455		0.436596	0.160477
CSNK1A1L	0.727473	-0.321704		0.403198	1.50868		0.767834	0.0819522
CSNK1D	0.949322	-0.320539		0.234352	0.299653		0.24906	0.139372
CSNK1E	0.604604	-0.295054		0.00440056	1.50101		0.266228	-0.404465
CSNK1G1	0.981632	-0.874348		0.798738	0.274068		0.282756	0.108543
CSNK1G2	0.931474	0.333162		0.00457541	1.21242		0.99229	-0.284431
CSNK1G3	0.0791184	-0.989969		0.495318	-0.84068		0.468629	-0.206056
CSNK2A1	0.0383166	-1.9858		0.878488	-0.386873		0.425059	-0.287028
CSNK2A2	0.850749	-0.214675		0.799562	0.124461		0.343762	-0.243625
CSNK2B	0.0187867	-1.53505		0.41612	-1.0106		0.0458118	-0.475414
CSPP1	0.496096	0.222555		0.807032	-0.54811		0.57048	-0.355951
CSRNP1	0.252521	0.501495		0.0966988	-1.66092		0.198325	-0.668989
CSRP2BP	0.110655	0.562543		0.529417	0.4462		0.174677	0.182793
CST3	0.0979091	1.721		0.378247	-0.323973		0.265963	0.010518
CST4	0.939298	-1.00578		0.688457	0.168004		0.312372	-0.734794
CST5	0.977657	1.19681		0.238063	1.38017		0.755307	0.117741
CST7	0.820941	0.233402		0.294046	0.367771		0.466182	0.139654
CST8	0.462607	-0.548984		0.560777	-0.0380185		0.0418997	0.598535
CSTA	0.978493	-0.245341		0.703269	-2.58099		0.0996764	-0.935473
CSTB	0.570241	-0.782144		0.990568	0.00403333		0.963038	-0.285445
CTAG1A	0.515217	0.503584		0.188354	0.742282		0.163911	0.553981
CTAG1B	0.431338	-0.149596		0.988707	0.50156		0.828117	-0.521655
CTAG2	0.757519	-0.200805		0.134394	-2.5368		0.12034	0.931199
CTBP1	0.366316	0.0254233		0.001907	-1.71566		0.00249077	-0.712108
CTBP2	0.0419397	0.80922		0.0667398	-2.12707		0.355958	0.234883
CTCF	0.153973	-2.7348		0.284367	0.320998		0.593738	-0.972923
CTDNEP1	0.0114897	-1.37437		0.00861625	1.56666		0.067457	-0.838396
CTDP1	0.0561715	-2.86536		0.628402	-0.239686		0.205716	0.103671
CTDSP1	0.717155	-1.6211		0.901981	0.218242		0.311995	-0.544653
CTDSP2	0.732206	-0.242592		0.0760109	0.164798		0.841357	0.7675
CTDSPL	0.760215	-0.329736		0.472052	-0.117879		0.064266	-1.41483
CTGF	0.309653	-0.423523		0.928949	-0.431751		0.528143	-0.400264
CTH	0.714217	-0.723763		0.18119	0.220157		0.57585	-0.0769935
CTHRC1	0.140153	-1.21094		0.732925	-1.58401		0.601403	-0.269388
CTLA4	0.371981	0.485419		0.421338	0.499273		0.324229	-0.557608
CTNNA1	0.241229	-0.618835		0.708624	-0.519291		0.345759	-0.5627
CTNNA2	0.159399	0.521389		0.302387	-0.384273		0.0859083	-0.653423
CTNNA3	0.323341	1.10684		0.194347	0.456526		0.825659	-0.325383
CTNNB1	0.172368	-1.21043		0.132837	-1.00691		0.0818078	0.292382
CTNND1	0.455207	0.430459		0.596952	-0.0289436		0.455662	-0.223594
CTNND2	0.445055	0.560111		0.112566	-1.14524		0.836425	0.0180426
CTNS	0.266826	0.528273		0.979378	-1.37931		0.754613	-0.240358
CTRB1	0.680449	0.574431		0.399466	0.356155		0.502677	-0.942261
CTSB	0.297629	-3.22552		0.83053	-0.959753		0.705916	0.240308
CTSD	0.339006	-1.05615		0.0463356	-1.65976		0.323842	-0.0947057
CTSF	0.453546	-0.877467		0.96404	-0.277047		0.886937	-0.206758
CTSG	0.865154	-0.462714		0.485237	-1.06038		0.21872	0.191612
CTSH	0.827868	-0.372344		0.833517	-0.389672		0.784153	0.11298
CTSK	0.161379	-1.21182		0.832266	-0.603165		0.289885	-0.381306
CTSL	0.23782	0.145887		0.0677277	1.26333		0.0227349	0.686557
CTSS	0.660373	-2.98487		0.414771	-0.982755		0.696416	-0.466148
CTSV	0.571846	-0.183215		0.484485	-0.467317		0.757312	-0.16594
CUBN	0.567571	-0.229405		0.496333	0.706237		0.462841	-0.119782
CUL1	0.0821057	0.686674		0.487012	0.498223		0.480212	0.194113
CUL2	0.0530635	-1.99609		0.0948163	-2.31072		0.234067	0.320232
CUL3	0.97253	0.516665		0.0652348	2.219		0.1259	0.78994
CUL4A	0.376212	0.507457		0.870594	-0.303149		0.625779	0.0523262
CUL4B	0.20304	-1.16644		0.882274	0.195749		0.9882	0.673323
CUL5	0.0453917	1.22202		0.696441	0.0730847		0.284349	0.409042
CUL7	0.369247	-1.58719		0.0701743	-1.13361		0.255432	-0.540411
CUTA	0.758417	-2.06974		0.391885	0.934324		0.337964	0.887418
CUX1	0.806468	-0.725841		0.0474451	1.13766		0.131456	0.252988
CUZD1	0.307596	0.319784		0.200618	0.767831		0.190997	-0.685539
CXCL10	0.415837	0.376958		0.812934	0.273739		0.358843	-0.461351
CXCL12	0.623737	0.361019		0.929132	-0.410135		0.284172	0.248053
CXCL14	0.319309	0.320809		0.534098	0.366452		0.742656	-0.265298
CXCL2	0.578555	-1.28576		0.122272	1.34071		0.917042	-0.301075
CXCL5	0.879723	-1.64947		0.408687	0.984786		0.301911	0.54436
CXCL9	0.386702	-0.310836		0.755358	-2.14772		0.430344	-0.400647
CXCR1	0.815138	-0.620965		0.860979	-1.83437		0.627057	-0.391623
CXCR4	0.360293	0.057368		0.149276	1.26022		0.37116	0.905263
CXorf22	0.422862	-1.21923		0.990056	-0.23752		0.842899	0.0332928
CXorf36	0.693187	1.28806		0.352403	0.711939		0.502426	0.203898
CYB5A	0.411789	-0.455338		0.973945	-0.445291		0.299884	-0.120253
CYB5B	0.250406	-0.712316		0.352818	-0.242098		0.386109	0.606886
CYB5R1	0.981632	-0.649763		0.684258	-0.324481		0.0835531	-0.677085
CYB5R3	0.0808818	0.74164		0.397228	0.952206		0.996066	-0.096961
CYC1	0.227956	-1.01521		0.608962	-0.447218		0.858357	0.182781
CYCS	0.074782	-1.54149		0.688919	-1.53934		0.218278	-0.668823
CYGB	0.52826	-2.26062		0.223275	-0.498412		0.799931	0.245592
CYLD	0.322956	-1.32348		0.154429	-1.64757		0.922239	0.123064
CYP11A1	0.725996	-1.43042		0.130578	0.432356		0.33876	-0.17836
CYP11B1	0.69493	0.143431		0.0841627	-0.29034		0.200952	-0.29384
CYP17A1	0.773136	-2.43835		0.55214	-2.0458		0.30665	-1.51689
CYP19A1	0.0620938	-3.46956		0.364681	-1.07436		0.466436	0.357529
CYP1A1	0.101045	1.52831		0.0936993	-3.01686		0.0932819	-1.17685
CYP1A2	0.0852874	1.07865		0.215674	0.272164		0.0150455	0.727093
CYP1B1	0.0669256	0.873453		0.451325	0.363161		0.12454	0.307758
CYP21A2	0.735763	0.00779393		0.0833026	-1.50844		0.0834124	-1.00835
CYP24A1	0.752435	-0.684929		0.499382	-0.373712		0.527885	-0.285496
CYP27B1	0.617348	0.647419		0.145803	-0.469552		0.672875	-1.50615
CYP2A13	0.962176	0.269165		0.165872	1.17477		0.711275	-0.0188133
CYP2A6	0.187833	1.51905		0.433002	0.626751		0.434506	0.759663
CYP2A7	0.312473	-1.32719		0.496079	0.276021		0.112989	0.227435
CYP2B6	0.83954	-0.513615		0.402387	-0.6254		0.782335	-0.260333
CYP2C18	0.785438	0.535361		0.485959	0.373605		0.0653664	0.668139
CYP2C8	0.0773863	-3.1125		0.254272	-1.07045		0.332229	-1.67711
CYP2C9	0.632954	-1.70081		0.709882	0.275621		0.84229	-0.101702
CYP2D6	0.521303	0.362823		0.108469	1.54247		0.489448	-0.268372
CYP2J2	0.254156	-1.36163		0.320195	-0.849161		0.809724	-0.139251
CYP3A4	0.0633372	-1.08083		0.0348531	1.38392		0.0859083	0.505079
CYP3A5	0.161974	-0.605737		0.787663	-2.22159		0.155067	-0.596671
CYP4A11	0.44582	-1.65096		0.059253	-1.19327		0.494102	-0.535111
CYP51A1	0.950575	-0.0124592		0.385711	-1.14077		0.774773	0.202423
CYSLTR1	0.609334	-0.373366		0.701782	-0.0853037		0.162246	-0.373853
CYSLTR2	0.17336	-1.43892		0.830878	-0.986215		0.421178	0.150099
CYTH2	0.914284	-0.268264		0.921309	-0.452491		0.264441	-0.529261
CYTH3	0.0232435	-1.62646		0.0964445	0.827076		0.0826418	0.510794
DAB1	0.444821	-1.03127		0.69822	-0.462532		0.634466	-0.0920635
DAB2	0.972844	-0.9461		0.0252899	1.33071		0.936203	-0.228032
DAB2IP	0.430206	-1.06892		0.0187065	-1.54214		0.155138	-0.772466
DACT1	0.220752	1.02764		0.966596	0.547948		0.976874	-0.326086
DAO	0.559598	-0.939299		0.473782	0.595278		0.775075	0.0213002
DAP	0.513948	0.71801		0.0281562	1.7286		0.0947459	0.609163
DAP3	0.0324241	-1.1647		0.317083	0.624028		0.486479	-0.225613
DAPK1	0.306292	-0.968463		0.481485	0.313688		0.273493	-0.15875
DAPK2	0.770727	-0.141021		0.499382	0.629637		0.433811	-0.241842
DAPK3	0.271258	-0.470896		0.260036	0.10324		0.122522	0.512973
DAPP1	0.915533	0.256751		0.581751	-0.168381		0.589923	-0.425855
DARS	0.297745	-0.637536		0.519025	-1.19855		0.0985418	0.97966
DARS2	0.00786428	-2.52842		0.709568	-0.335868		0.855261	0.367517
DAXX	0.947442	-0.392444		0.338472	-1.8103		0.759413	-0.12085
DBF4	0.793393	0.195364		0.00603024	-2.35439		0.0177999	-1.89807
DBH	0.435497	-0.360832		0.126449	0.490688		0.243278	-0.331913
DBI	0.819292	0.425272		0.167163	-1.30502		0.00331086	0.86331
DBP	0.521846	0.496458		0.272619	-1.03144		0.507212	-0.373912
DCAF12L1	0.152163	-0.0100633		0.428548	-1.17797		0.716865	0.124008
DCAF12L2	0.331215	0.583174		0.416929	-0.583848		0.179501	-0.568794
DCAF4	0.561454	0.100944		0.00650285	1.56156		0.131557	0.264864
DCC	0.137632	-1.52011		0.984662	-0.0762864		0.42323	0.200794
DCD	0.799163	-0.526998		0.0972975	1.16172		0.216806	0.398602
DCK	0.740217	0.382541		0.309201	-0.780181		0.893794	-0.0391938
DCLK1	0.21169	0.468416		0.618815	-0.347449		0.00494953	0.628631
DCLK2	0.14132	-1.17178		0.88418	0.200476		0.636717	-0.41598
DCLK3	0.798555	-0.0152624		0.37032	0.631625		0.241688	-0.21662
DCLRE1A	0.0396367	0.764766		0.0895959	-1.85301		0.223276	-0.375079
DCLRE1B	0.892155	-0.29674		0.145914	0.435599		0.975616	-0.241655
DCLRE1C	0.0837274	-2.14735		0.143374	0.827044		0.355753	-0.363209
DCN	0.0200175	-2.65647		0.380524	0.508602		0.339686	0.237381
DCPS	0.245733	0.444109		0.78446	0.229233		0.831499	0.267069
DCT	0.97137	-0.275774		0.344778	1.04802		0.846913	-0.565972
DCTD	0.633514	-0.612224		0.341254	-0.509573		0.0817386	-1.20123
DCTN2	0.0231005	-1.87066		0.207613	1.12383		0.330453	0.26336
DCTN3	0.0466675	-2.99605		0.13491	2.23999		0.614289	0.269034
DCTN4	0.0206528	-2.08786		0.834504	-0.369892		0.541379	0.0939396
DCX	0.124454	-1.51302		0.138007	1.23815		0.0967446	0.8804
DCXR	0.449761	-0.413578		0.0184429	-1.47649		0.107453	-0.342842
DDAH1	0.960922	-1.18824		0.171954	0.573679		0.406307	0.022857
DDAH2	0.0683148	-0.569274		0.162665	1.20852		0.113079	0.664155
DDB1	0.0373584	-1.59228		0.883941	0.502077		0.164072	-0.670347
DDB2	0.142494	-0.469321		0.0914584	-2.37586		0.0580016	-0.89897
DDC	0.40089	-1.87173		0.489004	0.0516137		0.368844	-0.2491
DDIT3	0.290746	-0.0239282		0.582025	-0.203443		0.00270323	1.02551
DDIT4	0.737247	-1.71125		0.755663	0.607833		0.17664	0.562676
DDO	0.0296591	0.870121		0.281954	1.03156		0.173729	0.813917
DDR1	0.0620387	-1.48139		0.702377	-2.00144		0.327921	0.490637
DDR2	0.00413078	-2.67416		0.873945	-0.297064		0.790629	0.237002
DDX10	0.971588	0.447875		0.435798	-0.602084		0.0384144	-0.947795
DDX11	0.296353	-0.487202		0.207613	-1.34778		0.032883	-0.725242
DDX18	0.107954	-0.798517		0.830219	-0.0327764		0.704527	0.239189
DDX20	0.89589	0.469695		0.937552	-1.08861		0.913787	0.402748
DDX23	0.0704801	-1.36747		0.378704	0.675832		0.0691261	-0.0136525
DDX39B	0.0646146	-1.53543		0.323555	-0.345714		0.830884	0.170763
DDX3Y	0.331506	-1.40992		0.0107919	1.76526		0.0193155	0.680811
DDX4	0.992307	-0.634513		0.507049	-0.952264		0.13554	0.920925
DDX54	0.38984	-0.512872		0.2923	0.374332		0.614143	0.242674
DDX6	0.505981	-0.561846		0.238642	-2.7494		0.18764	-0.302439
2016-12-01	0.491128	0.254265		0.798354	0.627727		0.287913	-0.322553
DECR1	0.617071	-0.740063		0.161508	0.542188		0.25991	0.153114
DEDD	0.22974	0.76537		0.147697	1.1684		0.0619329	1.56682
DEDD2	0.148591	-1.17612		0.572869	0.199807		0.399432	-0.0106953
DEFB1	0.177877	-0.374932		0.571082	-0.814977		0.551084	0.199464
DEK	0.237038	-1.22748		0.611208	0.344613		0.484259	0.379396
DENND2A	0.143246	-0.20346		0.807653	0.577665		0.156748	0.886459
DENND4A	0.511666	-0.0841012		0.725697	-0.341759		0.236651	0.292991
DERA	0.864105	-0.407934		0.388117	-0.687733		0.539051	-0.0963895
DES	0.156835	-0.499019		0.496333	-0.493113		0.135746	-0.236026
DET1	0.540167	-0.468127		0.110582	0.895588		0.359256	0.10972
DFFA	0.131281	-1.0278		0.462888	-2.66818		0.637561	0.259234
DFFB	0.633234	-0.523432		0.451807	0.948858		0.498163	-0.207358
DGCR6L	0.809517	-0.424261		0.906686	1.34061		0.208413	-0.100334
DGKA	0.440611	0.498165		0.273145	-1.6002		0.178719	-0.123924
DGKB	0.0186109	0.799833		0.13224	-2.38854		0.0660499	-0.434004
DGKD	0.426974	0.604886		0.202942	0.684604		0.686746	0.345462
DGKE	0.29836	-1.02938		0.0516744	-0.928727		0.627457	-0.13261
DGKG	0.352572	0.609212		0.572869	-0.4741		0.294425	0.602481
DGKH	0.943682	-0.299973		0.0205294	1.26784		0.134921	0.44499
DGKI	0.946815	-0.430709		0.0660572	-2.90818		0.55875	0.265415
DGKK	0.376849	-0.550152		0.642743	1.2303		0.854642	-0.296891
DGKQ	0.0274359	-1.73516		0.102079	0.924058		0.319989	-0.311567
DGKZ	0.558862	0.395037		0.184945	-1.19684		0.0486448	0.583249
DGUOK	0.552996	-0.273262		0.102163	0.161708		0.104304	0.532686
DHCR24	0.0260855	0.288195		0.971069	-0.138244		0.272975	0.923271
DHCR7	0.00375661	-0.949503		0.994085	0.200975		0.434506	-0.682673
DHDH	0.059124	0.441125		0.763596	0.235587		0.992605	-0.28275
DHFR	0.0267279	-1.05055		0.114645	0.704551		0.0102781	0.732024
DHFRL1	0.130018	0.749098		0.0924878	-0.758697		0.0703739	-0.438973
DHODH	0.971902	-0.356385		0.0389363	-1.24264		0.691685	-0.173187
DHPS	0.276956	-0.546035		0.914948	-0.367832		0.0260806	0.704288
DHRS11	0.877551	0.263073		0.440801	0.410992		0.155711	0.349666
DHRS2	0.223089	-1.08016		0.0785632	1.52131		0.530334	-0.2792
DHRS3	0.680449	-0.961741		0.142938	-0.227906		0.641509	-0.346945
DHRS4	0.313416	-0.999777		0.617052	-1.95696		0.349217	-0.367546
DHRS4L1	0.784365	-1.08925		0.158846	-0.379352		0.947642	-0.0595367
DHRS4L2	0.969392	-1.47201		0.247607	0.757828		0.0229248	0.749854
DHRS7	0.0145672	-2.02225		0.690819	0.0801244		0.656831	0.578993
DHX16	0.598902	-0.966941		0.179022	-1.34624		0.675269	0.218922
DIABLO	0.317038	0.377509		0.323762	0.449641		0.999171	0.151273
DIAPH2	0.514455	-0.145761		0.0709856	-2.15864		0.600031	-0.0204897
DICER1	0.0412858	-1.60237		0.250499	-0.588168		0.115086	-0.508477
DIP2C	0.0528109	-2.45535		0.129801	1.41709		0.143244	0.266913
DIRAS1	0.600818	0.335964		0.76543	-0.625279		0.418224	0.192694
DIRAS3	0.0316671	1.81544		0.276669	-0.20423		0.363701	-0.176259
DIS3	0.0122947	-1.74108		0.787013	-0.539541		0.141848	-0.980084
DISC1	0.850939	0.265321		0.35405	-1.53364		0.087353	-0.75411
DKK1	0.0234596	-1.56872		0.549227	-0.237932		0.958009	0.31367
DKK2	0.213857	-0.518972		0.145248	0.487352		0.340755	-0.0883641
DKK3	0.452524	-0.744227		0.201232	1.04018		0.110121	0.867951
DKK4	0.0930593	-1.84215		0.45418	-0.0741511		0.583408	0.350326
DLAT	0.409327	0.343256		0.40736	0.282392		0.548716	-0.128438
DLC1	0.750462	0.492696		0.244168	0.315433		0.780398	0.0169406
DLD	0.0749781	1.01229		0.977585	0.0427802		0.663156	0.252296
DLEC1	0.740217	0.240609		0.00908934	-2.5035		0.490936	-0.120305
DLG1	0.127012	-2.11807		0.318831	2.19745		0.239318	1.02715
DLG4	0.293993	-1.21888		0.716097	-1.30001		0.623546	0.209521
DLGAP5	0.14228	1.55014		0.522045	0.425267		0.226044	0.0902059
DLL1	0.446934	-1.01438		0.0646525	-3.17901		0.670861	0.245423
DLL3	0.844466	0.201727		0.932772	-2.01642		0.691394	-0.385889
DLL4	0.689994	-0.651301		0.00931532	-1.77447		0.219312	-0.336932
DLST	0.36112	-1.94919		0.143143	-0.645403		0.0802283	0.132655
DMBT1	0.513187	-1.0531		0.0165988	-2.60205		0.29422	-0.755039
DMC1	0.175859	0.430003		0.615993	-0.621363		0.155482	-0.564971
DMPK	0.538086	0.374355		0.977461	-0.688707		0.131658	0.226881
DMTF1	0.653544	0.193968		0.831641	-1.41669		0.603052	-0.346457
DNA2	0.0687631	-2.78417		0.385167	0.36176		0.312939	-0.732747
DNAH8	0.516743	-1.27269		0.916538	-0.455586		0.809419	0.135711
DNAJA1	0.502344	-0.93099		0.155825	-2.00907		0.653228	0.288257
DNAJA2	0.728064	-1.11939		0.43979	0.807438		0.09992	0.0176981
DNAJA4	0.00503119	1.22897		0.0130927	-0.959171		0.0690056	-0.427549
DNAJC15	0.654526	-1.52261		0.577591	-0.278424		0.306654	-0.255314
DNAJC2	0.0630922	-1.87361		0.155592	0.839493		0.983795	-0.364581
DNASE1	0.624573	-0.213864		0.425515	0.621567		0.335385	-0.238192
DNM1	0.131181	-1.82827		0.745934	-0.242563		0.5654	0.473149
DNM2	0.479803	-0.63817		0.250165	1.24428		0.156517	-0.187448
DNM3	0.238289	-1.28803		0.105941	0.307426		0.564334	-0.547285
DNMT1	0.383472	-1.79548		0.0168361	1.80368		0.0588415	0.207105
DNMT3A	0.574257	-0.66614		0.28255	0.228191		0.2171	0.751649
DNMT3B	0.530837	-0.45048		0.761152	0.105494		0.723063	-0.212293
DNPEP	0.359056	-0.588074		0.653192	-0.102941		0.074893	-0.611273
DNTT	0.264291	-0.363654		0.846676	-0.122368		0.246478	-0.404185
DOCK1	0.72511	-0.261856		0.407133	0.164277		0.482044	0.198697
DOCK9	0.566772	-0.535521		0.322541	-1.98413		0.00557056	-1.21686
DOK1	0.670381	0.122366		0.510648	0.412821		0.0834124	0.581379
DOLPP1	0.120765	0.632132		0.0704228	-1.90759		0.940422	-0.604394
DOT1L	0.0953814	1.21938		0.2009	-2.22048		0.503431	-0.319538
DPAGT1	0.937733	-1.10863		0.409407	-0.417901		0.527775	0.264148
DPEP1	0.0325809	1.27567		0.357593	-0.737289		0.113941	-0.425088
DPH1	0.155114	1.34071		0.0195452	1.27245		0.134145	0.53315
DPH5	0.184948	-1.67857		0.10583	1.77103		0.680664	0.434043
DPP10	0.0283883	1.59293		0.745934	-0.609516		0.321858	0.352362
DPP4	0.419908	0.129291		0.925447	-0.539571		0.111208	-0.155132
DPP6	0.270487	-0.978042		0.425364	-1.8153		0.555495	-0.0324312
DPYD	0.647652	0.849581		0.599317	0.614856		0.654428	0.371224
DPYSL4	0.583409	-0.339642		0.598343	-0.553667		0.0177809	0.598653
DRD1	0.29345	0.360619		0.29512	0.496914		0.0271584	0.704912
DRD2	0.112957	-0.877389		0.0376627	-2.00635		0.323262	-0.385544
DRD3	0.431606	0.669405		0.0565792	-1.25551		0.13496	-0.508456
DRD4	0.36112	-0.509893		0.600572	-1.37373		0.94105	-0.502667
DRD5	0.445994	0.281502		0.724194	0.379787		0.985683	-0.0839548
DSCAML1	0.372403	-0.765192		0.247861	-1.44001		0.704527	-0.401389
DSN1	0.994819	-0.768742		0.558009	-0.814378		0.674661	-0.196467
DST	0.0991123	-0.976856		0.446763	0.0948276		0.17923	-0.609798
DSTN	0.997959	0.178159		0.676987	-1.16068		0.778702	0.155546
DSTYK	0.636039	-0.521089		0.73685	0.0598284		0.149378	-0.576711
DTL	0.0719761	-1.90861		0.93445	0.374856		0.383305	-0.510074
DTX1	0.326436	-0.143592		0.201607	1.16624		0.455662	0.218832
DTX3L	0.461169	-0.768475		0.320976	-2.36363		0.117449	-0.881062
DTX4	0.115851	-0.758265		0.43042	0.733964		0.114521	0.394028
DTYMK	0.957159	-0.308604		0.107046	-2.01958		0.142276	-0.645801
DUSP1	0.75722	-0.937106		0.923537	0.250023		0.604702	-0.555506
DUSP10	0.460691	-0.673893		0.337664	-1.73329		0.732244	0.176549
DUSP11	0.707182	-0.392908		0.414887	-0.51299		0.0629703	0.614229
DUSP12	0.132088	-1.88184		0.81138	0.731109		0.345978	-0.353721
DUSP13	0.237351	-0.796195		0.104112	0.695486		0.0139521	0.767373
DUSP14	0.259696	-1.07735		0.111054	0.683817		0.783272	-0.409237
DUSP15	0.458064	-0.969952		0.0461601	-1.28863		0.476653	-0.152209
DUSP16	0.586926	-0.234075		0.570537	-0.394354		0.639534	-0.666572
DUSP18	0.536788	-0.23646		0.586154	-0.0296464		0.50318	0.616026
DUSP19	0.0512885	0.608535		0.808584	-0.288279		0.422773	0.641402
DUSP2	0.199432	-1.52075		0.998561	-0.103889		0.736403	-0.198214
DUSP21	0.546432	-0.18324		0.791862	-2.32001		0.953924	0.345823
DUSP22	0.86825	-0.438688		0.222131	-0.737208		0.819828	-0.471712
DUSP23	0.42423	0.373125		0.826018	0.915691		0.715098	0.229906
DUSP26	0.236259	-0.387619		0.1113	-0.00614112		0.380514	0.389183
DUSP27	0.341073	0.473		0.014735	1.12735		0.241047	-0.88394
DUSP3	0.0356852	0.692134		0.0572557	-2.67667		0.481061	0.293521
DUSP4	0.535492	-0.478829		0.410771	0.0902999		0.987885	-0.329701
DUSP6	0.569974	-0.738666		0.639301	-0.369069		0.795694	-0.371205
DUSP7	0.0629249	1.60642		0.0122909	-1.92604		0.00645879	-0.973744
DUSP8	0.490632	0.991784		0.0532346	1.08148		0.214758	0.259413
DUSP9	0.782792	0.160349		0.237361	-0.800408		0.832422	0.0734908
DUT	0.196416	-1.24298		0.494354	-0.326858		0.770547	-0.485955
DUX4	0.022852	-1.2245		0.119089	-1.85124		0.290201	-0.411599
DYNC1H1	0.717155	0.204451		0.206028	1.2135		0.791741	-0.186918
DYNC1LI1	0.520057	0.642035		0.695256	-0.406586		0.314455	-0.183983
DYNLL1	0.58422	-1.45403		0.0552656	-2.44737		0.0692469	-0.225417
DYRK1A	0.0246956	-1.91162		0.220079	-3.08415		0.115765	0.0785837
DYRK1B	0.182611	0.302382		0.264814	-0.419581		0.489944	-0.323304
DYRK2	0.860514	-0.572155		0.846362	-0.455173		0.512023	-0.659832
DYRK3	0.182611	-1.72339		0.33324	-1.39384		0.823203	-0.188745
DYRK4	0.00182704	-1.79681		0.62373	0.398877		0.0668061	0.695285
DZANK1	0.13108	-1.48624		0.16235	0.0128359		0.435666	-0.167687
E2F1	0.834314	-0.00311071		0.574355	-3.2002		0.645184	-0.223859
E2F2	0.587197	-0.508414		0.477004	-0.209618		0.26041	0.669345
E2F3	0.581789	-0.203015		0.0694798	-2.91943		0.236339	0.728852
E2F4	0.140258	-2.04748		0.0504177	0.303214		0.511061	-0.203544
E2F5	0.338988	-0.259333		0.820349	-0.323389		0.866417	0.706002
E2F7	0.857114	0.441723		0.110403	-1.42964		0.0316743	-0.764653
E2F8	0.276782	0.705762		0.736548	-1.04725		0.186355	-1.01301
E4F1	0.0204767	-2.09004		0.0451749	2.62525		0.118138	1.27577
EARS2	0.867368	-0.785811		0.864229	-0.776875		0.753412	-0.235207
ECE1	0.46983	-0.054734		0.0237205	1.37733		0.594011	-0.071747
ECHS1	0.563578	-0.203672		0.0394321	0.34786		0.219904	0.761043
ECM2	0.440681	0.0575148		0.800332	-0.184342		0.237056	-0.449903
ECT2	0.132391	-1.36869		0.0304109	-0.549181		0.226044	-0.336873
EDA	0.646179	0.29974		0.0637298	0.00999718		0.533573	0.265893
EDA2R	0.143353	-0.970236		0.239436	1.0792		0.478855	-0.234665
EDAR	0.225687	-1.63062		0.825082	-0.257147		0.408987	0.337273
EDDM3B	0.690284	-0.693642		0.0270822	0.263622		0.168741	0.0671056
EDIL3	0.330918	-0.540161		0.913676	0.613518		0.57343	-0.203346
EDN1	0.565972	0.762487		0.686393	-0.42904		0.656261	-0.179734
EDN2	0.310028	-0.812275		0.63501	-1.91833		0.13668	-0.759224
EDNRA	0.937733	-0.499064		0.127547	-0.402745		0.696053	0.478131
EDNRB	0.0307422	1.36473		0.294196	0.67009		0.416864	-0.183783
EEA1	0.410669	-0.967064		0.153041	0.594044		0.806058	-0.2723
EEF1A1	0.118892	-0.640393		0.477004	0.368708		0.344164	-0.21824
EEF1A2	0.396711	-1.95075		0.0322416	-2.43994		0.0789422	-0.601448
EEF1E1	0.490632	-0.640261		0.244759	-1.45425		0.271942	-0.683398
EEF2	0.639974	-1.58401		0.450844	-0.827087		0.803006	0.201168
EEF2K	0.466889	-1.855		0.954428	0.138448		0.822178	-0.150334
EFCAB2	0.790966	-1.5758		0.349461	-0.435179		0.491681	-0.0766117
EFEMP2	0.0858604	-1.52302		0.321758	-2.00593		0.797216	-0.0258633
EFNB2	0.324307	-1.27207		0.835707	-0.101583		0.14465	-0.788644
EFTUD1	0.0247676	-3.60699		0.101141	1.10263		0.599209	0.604627
EGF	0.475654	-2.15016		0.623627	-0.291103		0.00423121	-0.762538
EGFL6	0.625688	-0.825309		0.599214	0.400877		0.895666	0.17479
EGFLAM	0.525433	0.550292		0.281475	0.37476		0.891612	-0.163013
EGFR	0.579215	-0.875631		0.243655	-0.361741		0.851239	-0.164494
EGLN1	0.0323923	-2.80771		0.216143	0.527432		0.231843	0.214614
EGLN2	0.431799	0.16051		0.472299	-1.03143		0.190462	0.360526
EGLN3	0.609085	0.136668		0.491955	0.344137		0.374338	0.156036
EHHADH	0.719509	0.483924		0.52989	0.0153104		0.754913	0.760565
EHMT1	0.889044	-0.0866653		0.502186	-1.46061		0.441728	-0.26129
EHMT2	0.452361	-1.40252		0.606974	-0.696021		0.177575	0.124523
EI24	0.89589	0.211622		0.29512	-2.20246		0.708925	0.274468
EID1	0.54199	-0.665334		0.00903145	1.29397		0.116436	0.0157025
EIF2AK1	0.55801	-1.36273		0.531466	0.0783121		0.761215	0.36677
EIF2AK2	0.412911	-1.37875		0.0496272	1.35273		0.819914	-0.244935
EIF2AK3	0.718038	0.362557		0.980977	0.0147279		0.221987	0.581967
EIF2AK4	0.313605	0.828373		0.986731	-0.409935		0.00601795	0.603423
EIF2S1	0.377487	-1.90953		0.557811	-1.16347		0.195452	-0.271685
EIF2S3	0.110919	-1.75113		0.337581	-1.09244		0.430344	-0.915634
EIF4A2	0.01748	-1.39036		0.114505	1.34133		0.0665718	0.560321
EIF4E	0.26446	0.206333		0.091151	1.00459		0.710687	-0.335767
EIF4EBP1	0.0930593	-2.08493		0.632441	0.513331		0.382016	-0.305108
EIF4G2	0.471767	-3.14407		0.530524	1.41423		0.0452284	-0.561423
EIF5A	0.0812418	-0.915774		0.0320776	0.921285		0.163095	0.310478
EIF5B	0.139835	-0.627703		0.540177	0.659838		0.298416	0.313721
ELANE	0.362155	-0.0775437		0.414887	1.33098		0.444542	-0.222067
ELF1	0.152276	-0.630785		0.620512	-1.27782		0.069914	-0.322503
ELF4	0.0225358	-1.08359		0.602246	-1.64029		0.830884	-0.169348
ELK1	0.677279	-0.60731		0.297363	1.07481		0.0365358	0.819259
ELK3	0.573185	-0.255233		0.577479	-0.274453		0.39657	0.229776
ELK4	0.720687	-1.71037		0.290523	0.44785		0.288092	0.273975
ELL	0.142058	-1.00625		0.343402	-3.10076		0.472566	-0.227079
ELN	0.155486	-1.24424		0.111624	-2.41333		0.243583	-0.444201
ELOVL2	0.460212	-0.419489		0.0140184	0.951732		0.8832	-0.0290178
ELOVL4	0.040653	-0.75802		0.342125	0.680982		0.663116	0.290783
ELSPBP1	0.774642	-0.302318		0.348681	0.0294891		0.370949	-0.203007
EME1	0.449761	-1.75601		0.614971	0.213108		0.635872	-0.260472
EML4	0.0601363	1.55172		0.0993362	0.821178		0.215196	0.193036
EMP1	0.187833	-0.326185		0.274551	-0.117819		0.702771	0.138384
EMP2	0.0232914	-2.23554		0.165017	-0.450537		0.133997	-0.724598
EMP3	0.109519	-0.608485		0.355263	-1.37384		0.235444	-0.480383
EN2	0.847239	-0.752704		0.976182	-0.323983		0.779913	0.292395
ENDOG	0.947566	-0.611897		0.0305731	-2.96828		0.539803	-0.211313
ENDOV	0.732503	0.616759		0.754749	-0.115896		0.533055	0.276186
ENGASE	0.468622	-0.232269		0.745934	0.495799		0.846295	0.260301
ENO1	0.668948	-3.21842		0.132355	0.240405		0.119121	-0.62064
ENO2	0.552206	-0.293429		0.0187233	-1.59158		0.233696	-0.167365
ENO3	0.843234	-0.604588		0.0956907	1.12953		0.702186	-0.356724
ENOPH1	0.715686	-0.827037		0.862307	-0.557394		0.385893	-0.153258
ENPEP	0.0169198	-1.77604		0.97051	-0.0688774		0.971308	-0.354409
ENPP1	0.20123	-2.10216		0.445567	-0.370313		0.104894	0.061884
ENPP2	0.505609	-0.0221782		0.321282	0.90311		0.0391486	0.738564
ENPP3	0.237748	-0.063248		0.0706722	1.11455		0.498314	-0.112803
ENPP4	0.605893	-0.632051		0.743175	0.87115		0.881828	0.432866
ENTPD5	0.484709	-0.58831		0.714922	-1.0257		0.692982	0.155607
ENTPD6	0.480292	0.241156		0.0401273	-2.81419		0.405416	-0.359099
EP300	0.585031	0.414926		0.147587	-2.26577		0.397669	0.189382
EP400	0.62486	0.351861		0.404626	-1.20809		0.129877	-0.272474
EPAS1	0.935855	-0.430407		0.683743	-1.54492		0.361327	-0.590349
EPC2	0.52159	0.25488		0.954141	0.600256		0.578274	-0.174678
EPG5	0.415837	0.449741		0.59168	-0.580368		0.940109	-0.171798
EPHA1	0.473708	0.367859		0.736245	-0.426263		0.382875	-0.482029
EPHA10	0.889044	-0.504051		0.321171	0.260907		0.163553	-0.150686
EPHA2	0.0206744	-1.56184		0.248847	-1.83651		0.385461	-0.648707
EPHA3	0.79734	-0.398932		0.817722	0.0409848		0.934148	-0.260236
EPHA4	0.30462	-0.833007		0.0707971	-1.10181		0.660256	-0.0971167
EPHA5	0.275221	1.0728		0.133147	0.2213		0.324229	0.0282367
EPHA6	0.751539	-0.873751		0.962642	0.0790076		0.850312	-0.752791
EPHA7	0.724815	-0.793491		0.887978	-0.607658		0.363405	-0.0960845
EPHA8	0.56944	-0.573072		0.606159	-1.04408		0.930072	-0.243801
EPHB1	0.663512	0.434507		0.930223	-0.566319		0.91942	-0.293832
EPHB2	0.631834	0.213231		0.113568	-1.38171		0.248413	-0.581733
EPHB3	0.419001	-1.71056		0.883231	-0.83511		0.980334	-0.893362
EPHB4	0.0714421	-1.52746		0.765124	-1.13275		0.150607	-0.208257
EPHB6	0.449289	0.074334		0.20488	1.30337		0.50797	-0.262051
EPHX2	0.198332	0.264403		0.0392026	1.45828		0.603877	-0.0792903
EPM2A	0.0939054	-1.26897		0.778922	-0.72292		0.312183	0.109091
EPN1	0.706597	-0.28434		0.715798	0.186628		0.271597	-0.252016
EPN2	0.653828	0.262626		0.482984	-0.0727425		0.19709	-0.75399
EPO	0.410221	0.360348		0.134916	-1.25412		0.636717	-0.235706
EPOR	0.818068	0.388973		0.0977837	1.22725		0.901284	-0.243662
EPRS	0.54173	0.467183		0.490359	-1.73722		0.906908	-1.2674
EPS15	0.959981	-0.652429		0.763902	-0.630942		0.0851854	-0.218516
EPS8L1	0.321609	-0.0834704		0.533835	-0.471274		0.785366	0.00290253
EPX	0.123618	1.11703		0.553511	0.425305		0.718634	0.239327
ERBB2	0.52646	-1.05975		0.161268	-0.335399		0.165469	-0.717426
ERBB2IP	0.00704679	-1.5926		0.451161	-0.530726		0.0184658	-1.15852
ERBB3	0.642228	-0.219947		0.401487	-0.886359		0.484752	0.269
ERBB4	0.469589	-0.558994		0.140872	-2.48805		0.644618	-0.69112
ERC1	0.474194	1.36671		0.00844047	-1.63135		0.209843	-0.682902
ERCC1	0.64392	-0.602406		0.698813	-1.45088		0.578814	-0.395081
ERCC2	0.704842	-2.23623		0.899704	0.0434315		0.766329	0.272289
ERCC3	0.171517	-0.765541		0.839785	-0.841159		0.861526	0.27321
ERCC4	0.56225	-0.295337		0.0374688	-2.30046		0.924431	-0.0640836
ERCC5	0.873902	0.243403		0.28979	-0.760425		0.895666	-0.123496
ERCC6	0.353514	-0.765499		0.926446	-0.315479		0.328506	-0.228136
ERCC8	0.528394	0.685759		0.201	0.791079		0.290423	0.702433
EREG	0.789148	-0.392428		0.902559	-0.795629		0.452808	0.476041
ERG	0.56944	-1.43702		0.214229	0.676869		0.350436	0.124929
ERN1	0.577479	-0.108807		0.499637	-0.50131		0.889741	-0.10572
ERN2	0.418548	-0.232683		0.0255904	-1.2628		0.0730765	-0.276971
ERO1LB	0.100002	0.296302		0.10635	0.422438		0.433116	0.121076
ERRFI1	0.929597	-0.373443		0.0117277	-1.97479		0.594011	-0.506199
ESCO1	0.640256	-0.580494		0.133251	-1.93373		0.0963935	-0.71933
ESCO2	0.674401	-0.28552		0.313607	-0.746017		0.320373	-0.155004
ESD	0.175984	-1.84937		0.827267	0.228729		0.231843	0.839245
ESPL1	0.0579658	-2.71405		0.491094	0.297389		0.102725	0.471708
ESR1	0.0354531	-1.28345		0.045619	-1.95498		0.418287	-0.275707
ESR2	0.265134	-0.971501		0.0131961	1.43266		0.385461	-0.465575
ESRRA	0.146282	0.916407		0.505767	-0.0795166		0.0762242	-1.27038
ESRRG	0.0865234	0.810951		0.0323392	-1.37128		0.190834	0.518968
ETFDH	0.616794	0.639732		0.397005	0.493285		0.168132	0.640919
ETNK1	0.877551	-0.287509		0.348887	0.449341		0.884134	-0.499895
ETNK2	0.593717	0.573926		0.20388	-1.47479		0.663688	0.233327
ETS1	0.742298	-1.25632		0.055393	1.42934		0.0147693	0.670128
ETS2	0.436225	0.151094		0.203843	-0.596184		0.752516	0.14093
ETV1	0.227198	0.678649		0.305466	-1.67257		0.518389	-0.397501
ETV4	0.344602	-0.530417		0.787542	-0.635432		0.112542	-0.630847
ETV5	0.377487	-0.36453		0.234668	-1.57138		0.169597	0.271698
ETV6	0.0860042	-2.28205		0.659195	0.170206		0.790221	-0.0648155
EVI5	0.0419757	1.17328		0.651574	0.364455		0.455316	-0.350601
EWSR1	0.086877	-3.37572		0.0837175	3.15544		0.0740629	-0.733282
EXO1	0.378887	-0.391452		0.322543	0.424825		0.00653017	-0.892797
EXO5	0.57533	-0.729725		0.351205	-1.73782		0.2468	-0.432761
EXT1	0.075815	0.265215		0.868701	-1.58189		0.496663	-0.162744
EXT2	0.143246	0.745901		0.0619731	-1.48548		0.184391	-0.0603125
EXTL2	0.633234	0.354802		0.439852	0.04286		0.788703	-0.754673
EYA2	0.775848	0.47614		0.76329	-0.0987582		0.985368	-0.0694245
EZH2	0.672677	0.237675		0.371177	0.72124		0.819215	-0.51339
F10	0.129481	1.23263		0.369892	-0.436299		0.536169	-0.411673
F11	0.476085	-2.45176		0.545566	-1.18395		0.100491	-0.573715
F13A1	0.342997	-1.18049		0.366905	1.01417		0.640098	0.287945
F2	0.328965	0.955901		0.602804	0.628756		0.281873	-0.202903
F2R	0.244454	-0.985242		0.251819	-3.04606		0.261749	-0.490691
F3	0.537827	-0.93731		0.933091	0.0137754		0.368844	0.507832
F5	0.272632	0.372746		0.73685	-0.571407		0.321142	3.43156e-05
F7	0.780979	-0.614728		0.570537	0.736029		0.377522	0.58563
F8	0.632114	-0.805594		0.710197	-0.783866		0.102217	-0.735933
F9	0.154279	0.711495		0.679256	0.347642		0.448563	-1.45198
FAAH	0.146282	1.05177		0.711016	-0.52971		0.214613	0.62957
FABP6	0.00870051	-2.40591		0.157761	-2.38708		0.829654	-1.02823
FADD	0.675264	-0.0598133		0.543097	-0.884509		0.128754	-0.55842
FADS1	0.406651	-1.08139		0.664135	0.188732		0.598387	0.191345
FADS2	0.119451	-0.984865		0.363721	-0.782547		0.381372	-0.406867
FAH	0.510907	-0.929166		0.988033	0.156577		0.698679	-0.408946
FAIM	0.284686	-1.72602		0.357593	-0.379097		0.343001	0.833021
FAIM2	0.298543	-0.489979		0.0382587	-3.22795		0.7884	-0.457758
FAIM3	0.154201	-0.0916175		0.262418	-1.39327		0.245194	0.684375
FAM110A	0.0308336	-1.22261		0.187645	0.356735		0.0683488	0.198066
FAM110B	0.92991	-3.10539		0.121321	-0.935705		0.0167784	-0.592196
FAM110C	0.121615	0.330775		0.789084	-1.71088		0.51431	-0.116574
FAM118A	0.0655958	-0.381537		0.407012	-1.36917		0.431267	1.00127
FAM127C	0.632394	-0.751235		0.0822376	-0.879872		0.166555	-0.789369
FAM161A	0.0713185	0.0652019		0.874697	-1.58253		0.279411	-1.33378
FAM161B	0.125654	-0.924883		0.441439	-0.510317		0.127155	-0.434269
FAM171B	0.026431	-1.96588		0.618533	-0.366946		0.300805	0.18028
FAM175B	0.13108	-0.0589349		0.680215	-0.275225		0.879776	0.104737
FAM184A	0.527745	-0.323603		0.193659	-3.23916		0.466213	-0.789582
FAM193B	0.3174	-0.527878		0.419719	-0.351857		0.0885272	0.60849
FAM19A5	0.26446	0.822186		0.774928	-0.245777		0.530467	-0.292626
FAM220A	0.227046	0.395912		0.636725	0.0671129		0.882577	-0.176864
FAM46D	0.129183	-1.46644		0.339079	-1.48373		0.115612	-0.819579
FAM53B	0.692025	-0.28949		0.44199	0.120793		0.579083	0.21882
FAM64A	0.852375	-0.964243		0.241615	1.56007		0.738783	0.229616
FAM71D	0.0312634	-1.87121		0.426894	0.185344		0.591829	0.26855
FAM76B	0.355979	-0.605075		0.423215	0.303266		0.218749	0.441225
FANCA	0.547217	-0.66782		0.624761	0.405813		0.94827	0.124841
FANCB	0.534455	-1.20256		0.959569	-0.569469		0.781729	0.121394
FANCC	0.366108	-0.327603		0.358244	-1.15724		0.203885	-0.280055
FANCD2	0.106314	-0.773152		0.103449	-0.975293		0.23125	-0.466579
FANCE	0.952143	-0.559971		0.340701	-0.731301		0.287376	-0.814164
FANCF	0.11467	-1.70944		0.880385	-0.345513		0.146725	-0.166553
FANCG	0.054618	-0.96579		0.388855	0.520442		0.640087	0.592434
FANCI	0.208255	0.00494533		0.107132	-1.07584		0.0158329	-0.690482
FANCL	0.446934	-1.46454		0.701094	0.279801		0.137618	-0.536807
FANCM	0.51598	-0.731595		0.12845	-1.38125		0.698679	-0.303543
FARS2	0.645049	-0.253071		0.0830887	1.11927		0.13554	0.254616
FARSA	0.32955	-1.26627		0.362875	-1.12		0.449492	0.239479
FARSB	0.0120239	-3.95787		0.811358	-0.835164		0.206134	1.04443
FAS	0.18158	1.65045		0.965794	-0.556833		0.585576	-0.135252
FASLG	0.810432	-1.12028		0.357572	0.0697133		0.721881	0.0237486
FASN	0.3906	-1.76947		0.363086	-0.0973938		0.477876	0.314859
FASTK	0.863607	-0.682894		0.782921	-0.0535434		0.825966	0.317811
FBLN1	0.316069	-1.16288		0.708712	-0.553333		0.490172	0.220944
FBLN5	0.811653	0.334619		0.507305	-1.99509		0.592102	0.218721
FBN2	0.361534	0.404079		0.0156612	1.46374		0.0837646	0.666196
FBP1	0.517252	-0.595599		0.438666	-0.857535		0.319605	-0.652347
FBP2	0.317591	0.541881		0.518924	-0.382476		0.801786	-0.118301
FBXL18	0.592628	-0.282177		0.986092	-0.508162		0.711275	0.35642
FBXL20	0.997017	0.617189		0.145581	-0.430403		0.585033	-0.0781369
FBXO24	0.21824	-1.36489		0.0917956	0.153438		0.21186	0.0917535
FBXO5	0.0264194	1.36314		0.298343	1.49196		0.465165	0.323233
FBXW11	0.482007	0.532678		0.931816	-1.00707		0.596197	-0.204959
FBXW2	0.930535	-0.391409		0.319805	0.434464		0.908158	0.211762
FBXW7	0.288217	-0.464787		0.228803	0.376847		0.443369	0.696756
FCER1A	0.436424	-0.314064		0.348375	-1.77909		0.983795	0.435975
FCER1G	0.549053	0.622212		0.934047	-0.256564		0.627457	0.00359632
FCGBP	0.758417	-1.07657		0.392587	1.39947		0.651423	-0.240322
FCGR1A	0.814401	-0.147602		0.196421	-1.32775		0.481307	-0.170878
FCGR1B	0.430647	1.35378		0.486993	1.37863		0.72602	-0.433344
FCGR2A	0.78249	0.342561		0.760236	-0.154418		0.971841	-0.128131
FCGR2B	0.37367	-0.250582		0.0305687	0.945535		0.214031	-0.56509
FCGR2C	0.372403	-0.597992		0.164651	1.06626		0.338959	-0.206378
FCGR3A	0.00119406	-4.55647		0.849707	0.105686		0.427066	-0.101599
FCGR3B	0.572986	0.25988		0.18438	-0.408131		0.0168544	-0.346679
FCRL2	0.540167	0.334668		0.695256	-1.04131		0.133997	-0.392819
FCRL4	0.351679	0.399052		0.702377	-0.114013		0.917855	-0.193888
FDPS	0.497592	0.598058		0.612051	-0.342364		0.205999	-0.191279
FDX1	0.484463	0.248771		0.0400107	-1.44427		0.0561989	-0.494471
FDXR	0.544078	-1.78827		0.180016	2.31329		0.152633	0.630263
FECH	0.527745	-1.1127		0.018304	0.47808		0.364864	0.338825
FEM1B	0.802509	-1.12333		0.930861	0.696616		0.361327	-0.0743678
FEN1	0.779167	-0.414607		0.223957	0.417552		0.950783	0.300725
FER	0.995133	-0.550343		0.945844	0.543017		0.405861	-0.0802903
FES	0.214438	-1.46227		0.270349	-0.926748		0.71245	0.196151
FEV	0.898692	-0.547588		0.992806	-1.11269		0.711862	-0.104432
FEZ1	0.889355	-0.0588232		0.0276147	-2.74648		0.13668	-0.548998
FFAR1	0.787028	-0.405576		0.790319	0.159359		0.188334	0.5829
FGA	0.95904	0.478029		0.667339	0.37047		0.999213	-0.375807
FGB	0.88749	-2.33333		0.39805	0.0801799		0.660744	0.297784
FGF1	0.323442	-0.465599		0.191334	-2.40991		0.0817386	-0.784755
FGF13	0.678431	-1.74736		0.0773495	1.2983		0.0399148	0.830051
FGF14	0.476342	-0.371693		0.39587	-0.343127		0.529679	0.628773
FGF2	0.746765	-1.80032		0.789393	0.441144		0.419813	0.288476
FGF20	0.345004	-0.930663		0.27578	0.922831		0.872315	0.131677
FGF23	0.389298	0.181179		0.842598	-0.905981		0.425517	0.0278524
FGF4	0.983516	-0.329948		0.0881222	0.193193		0.871073	-0.321935
FGF7	0.200814	-1.08455		0.889614	-0.340055		0.789988	-0.0905347
FGF9	0.84693	-1.60112		0.675898	-1.21516		0.35064	0.502614
FGFR1	0.00851139	-2.39894		0.670347	0.186845		0.249546	-0.168982
FGFR1OP	0.130366	1.16873		0.577789	0.331835		0.355589	-0.321186
FGFR2	0.330671	-0.429114		0.353127	0.612602		0.201044	0.470579
FGFR3	0.186912	0.118499		0.661518	0.167369		0.72129	-0.247966
FGFR4	0.580441	0.0964002		0.0214653	-0.694045		0.0779388	-0.671316
FGG	0.254484	-1.22126		0.485488	-0.551064		0.936657	-0.450373
FGGY	0.954964	-1.24227		0.88094	0.507962		0.444342	0.212242
FGR	0.0731566	1.08474		0.17011	-0.440809		0.273186	-0.198369
FH	0.132695	0.694185		0.782613	-0.382313		0.437992	-0.255542
FHIT	0.43598	-0.274056		0.250905	-1.58386		0.235404	0.379757
FHL1	0.43596	-1.9424		0.40895	-1.82515		0.805448	0.337128
FHL2	0.0418426	0.849934		0.0239766	1.35903		0.225005	0.474635
FICD	0.448818	0.0501686		0.472793	-0.646081		0.825045	-0.0377403
FIGF	0.85835	0.369721		0.843225	-1.52627		0.829961	0.586253
FIP1L1	0.430878	-1.6087		0.545758	-0.250698		0.308609	0.350015
FJX1	0.434571	0.0143394		0.346213	0.370795		0.408987	0.198762
FKBP1A	0.516078	0.236763		0.506356	0.471536		0.436843	-0.303277
FKBP8	0.683914	0.418524		0.672302	-0.605212		0.39372	-0.739518
FKBP9	0.956218	0.462378		0.260036	-0.888661		0.0498608	-0.897453
FLAD1	0.553259	0.120418		0.158175	-0.806977		0.193823	0.322629
FLCN	0.688255	-0.252793		0.309964	-0.856279		0.701309	0.13103
FLI1	0.385408	-0.454007		0.448201	-0.584971		0.779913	-0.175741
FLII	0.00477825	-1.97647		0.216643	0.767473		0.736734	-0.37642
FLJ44635	0.0847174	0.753053		0.940741	0.455207		0.335385	-0.200042
FLNA	0.0723747	-1.2621		0.337058	-0.50499		0.533055	0.313784
FLNB	0.72511	-0.337261		0.56809	-0.591786		0.367165	-0.243374
FLNC	0.0265888	0.628699		0.266035	0.668205		0.561672	0.112701
FLT1	0.61624	-0.189881		0.983854	-0.622098		0.228625	-0.322594
FLT3	0.180041	-1.82008		0.106032	1.02955		0.935716	0.307599
FLT3LG	0.236313	0.838036		0.031851	0.405204		0.714804	0.888007
FLT4	0.922406	0.156237		0.42911	0.407388		0.0903123	-0.600383
FMOD	0.180809	1.23758		0.491777	-1.41873		0.351455	-0.625205
FN1	0.205424	-2.11526		0.0911465	-1.56814		0.463322	-0.19013
FN3K	0.831857	-1.01676		0.675589	-0.962305		0.123576	-0.796229
FN3KRP	0.00462881	-1.80867		0.0558025	-2.27775		0.115795	-0.201733
FNBP1	0.508885	-0.493531		0.348681	0.364802		0.168863	0.539431
FNTA	0.295626	-0.314369		0.21881	0.850103		0.0433915	0.467565
FNTB	0.11476	1.3854		0.179236	-0.667126		0.225289	0.228604
FOLH1	0.469347	-0.197799		0.11878	0.935189		0.362365	-0.397829
FOLR2	0.822352	-0.175346		0.473782	1.47353		0.315975	0.716706
FOLR3	0.9952	1.11294		0.514447	0.600611		0.251721	-0.357543
FOS	0.975668	-0.527914		0.527206	0.624009		0.652928	0.331906
FOSB	0.827255	0.405034		0.313222	-2.43187		0.114884	0.919579
FOSL1	0.852482	-0.582851		0.392774	-0.748768		0.0656993	-0.610141
FOXC1	0.0194341	0.623344		0.887277	-0.742886		0.701903	-0.00317789
FOXG1	0.00263567	1.51595		0.632156	0.94492		0.0883797	0.191625
FOXI1	0.00361919	-1.84846		0.259727	0.916339		0.863625	-1.16005
FOXL2	0.737247	-0.653521		0.480488	-1.07844		0.503935	-0.38021
FOXN3	0.410445	0.208534		0.795476	-0.153058		0.54164	-0.0900857
FOXO1	0.572114	-0.59091		0.358873	-2.19016		0.37923	-1.01551
FOXO3	0.366525	0.220996		0.108538	1.58607		0.233541	0.596958
FOXO4	0.993877	-0.39832		0.26206	-1.68167		0.513547	0.283577
FPGS	0.851865	-1.53169		0.904658	0.389646		0.334002	1.04628
FPGT	0.48594	0.0956365		0.800522	-0.497727		0.946072	-0.30972
FPR1	0.448548	-0.420963		0.241951	1.19786		0.543208	0.384666
FRAT1	0.719215	-0.670245		0.224721	0.149388		0.132671	-0.441908
FREM1	0.312096	-1.79561		0.264986	0.600108		0.386758	-0.33662
FRK	0.243022	0.101696		0.334643	-0.609023		0.709806	-0.305144
FRMPD4	0.817151	-0.464811		0.137976	1.71574		0.118655	0.44587
FRS2	0.0699096	-1.18137		0.432075	-0.458984		0.833961	-0.134209
FRY	0.416965	0.367598		0.274199	0.230345		0.808808	-0.276589
FSCB	0.688834	0.670347		0.220617	-2.7949		0.934462	0.362481
FSHR	0.479803	-0.835196		0.640448	-0.233295		0.697512	0.277508
FSIP2	0.754241	-0.545048		0.108241	-2.30461		0.0806379	-1.31828
FST	0.94243	-1.45638		0.991207	-0.142871		0.479835	-0.18123
FSTL3	0.72836	0.589792		0.491777	1.00648		0.322105	0.273944
FSTL5	0.133916	-1.31797		0.0973784	0.295275		0.223484	-0.352267
FTCD	0.772533	-1.93945		0.357351	0.327318		0.385245	-0.46299
FTH1	0.215311	-2.48246		0.515678	1.10076		0.526145	0.359768
FTL	0.443649	-0.294676		0.510648	-0.743564		0.629416	0.0395055
FUK	0.444352	0.328472		0.788776	-1.14592		0.983795	-0.165361
FURIN	0.496594	0.332995		0.192016	0.4469		0.0718849	0.312527
FUS	0.252521	-0.600353		0.0111954	1.12789		0.084118	0.502781
FUT1	0.613197	0.740818		0.850444	-2.72574		0.185568	-0.856128
FUT11	0.964372	0.887378		0.143925	0.0515197		0.47959	-0.241754
FUT3	0.750941	-0.677024		0.974584	-0.63874		0.974043	0.244948
FUT8	0.0957796	1.15465		0.206994	-1.18341		0.102013	0.104772
FUT9	0.120106	-2.35208		0.820021	0.163407		0.577828	0.0605778
FXR1	0.652409	0.0701998		0.299205	-1.58181		0.484752	-0.669715
FXYD1	0.00910904	-1.35329		0.0587043	1.08129		0.137176	0.853916
FXYD2	0.41471	-0.364379		0.376993	-0.959043		0.132773	0.575248
FYN	0.381114	-0.756256		0.345192	-0.559032		0.133428	-0.311178
FZD1	0.480782	-1.58001		0.900656	0.0064119		0.164509	0.10257
FZD10	0.837387	-0.212275		0.238636	0.428414		0.676333	0.286053
FZD3	0.393511	-1.90823		0.465167	0.275376		0.876355	-0.447536
FZD6	0.17212	-0.434713		0.545225	0.30743		0.607181	0.223484
FZD7	0.827868	-0.211074		0.525176	0.352351		0.0063062	0.156959
FZD8	0.079455	1.23215		0.811069	-1.41604		0.469598	-0.197944
FZR1	0.184036	-1.55367		0.0726735	-2.48673		0.0185737	-1.25324
G0S2	0.175357	1.68109		0.469341	1.0068		0.810947	-0.120003
G6PC	0.523894	0.283236		0.0444358	0.93248		0.0152764	0.481083
G6PC2	0.992307	-0.250755		0.0788352	-0.773735		0.136758	-0.465263
G6PC3	0.760815	0.354923		0.335045	1.43391		0.63531	-0.122675
G6PD	0.341845	-1.09046		0.0869444	-4.33757		0.316998	-0.244846
GAA	0.155915	0.847152		0.567275	0.41857		0.691394	-0.429055
GAB1	0.496844	-0.341813		0.308266	-0.340608		0.691103	-0.261295
GABARAPL2	0.49959	-1.44211		0.227478	-0.883136		0.254445	-0.0929638
GABBR1	0.141746	-1.19685		0.231526	-2.30428		0.16923	-0.682771
GABBR2	0.87724	-0.714274		0.0433029	0.838062		0.00997152	0.565473
GABRA1	0.106608	1.42784		0.164273	-0.789914		0.477378	0.153717
GABRA2	0.0564764	-2.18262		0.0621413	1.34289		0.585651	0.25562
GABRA3	0.572381	-0.780712		0.240237	0.735048		0.646883	0.108993
GABRA4	0.852482	-0.0332632		0.255989	-1.6617		0.512785	-0.594661
GABRA5	0.243234	-1.60513		0.352611	-0.490087		0.630257	-0.143114
GABRA6	0.089736	-1.26266		0.684258	-0.376995		0.820135	-0.189235
GABRB1	0.0260327	-3.50002		0.119288	0.871559		0.129877	1.95014
GABRB2	0.220159	1.09548		0.163558	-1.30588		0.169597	-0.292605
GABRB3	0.774944	-0.767118		0.432818	-1.16901		0.266642	-0.580241
GABRD	0.468381	0.401144		0.102669	0.518707		0.326947	0.235022
GABRE	0.631834	-0.0998212		0.281475	1.42032		0.288987	0.911081
GABRG1	0.231927	-0.282639		0.470572	0.341501		0.0844726	0.375725
GABRG2	0.883139	0.263703		0.267572	-2.40981		0.150047	-0.246181
GABRG3	0.785817	0.633208		0.603363	0.0034964		0.982851	-0.236667
GABRP	0.945584	-0.827099		0.306264	0.284217		0.220037	0.724369
GABRQ	0.342997	0.674207		0.611707	-0.0929336		0.179357	0.630898
GABRR1	0.224333	-1.38825		0.672595	-1.89272		0.185306	-0.581181
GABRR2	0.10139	1.04218		0.874697	-0.668324		0.595104	0.0549821
GABRR3	0.852791	-0.34871		0.202942	0.58606		0.0852569	-0.313045
GAD1	0.339006	-1.99682		0.185953	0.84801		0.904096	-0.514694
GAD2	0.366108	-1.3018		0.0944207	0.368374		0.508476	0.763441
GADD45A	0.235637	-0.266747		0.0477598	0.245019		0.555836	0.0395825
GADD45B	0.521334	0.0588698		0.0461601	1.1027		0.0237899	0.635492
GADD45G	0.440145	-0.844909		0.366692	-0.361162		0.610494	-0.384403
GADD45GIP1	0.207403	-1.69994		0.176912	0.294808		0.316356	0.291613
GADL1	0.35597	-2.9775		0.56513	-2.75394		0.978132	-0.158461
GAK	0.454495	0.84461		0.10041	-1.82729		0.419813	-0.681788
GAL3ST1	0.0202265	1.11352		0.118298	-0.995064		0.110158	-0.727254
GALE	0.594807	0.283471		0.976821	-0.230286		0.834269	0.00115915
GALK1	0.597262	0.475836		0.224721	1.01812		0.37116	0.27749
GALK2	0.27713	-0.875988		0.402162	-1.29926		0.217983	-0.747106
GALM	0.858041	-0.663699		0.531729	-0.335202		0.890365	-0.0840176
GALNS	0.532386	-0.840814		0.365842	-0.583164		0.912223	-0.560046
GALNT1	0.0862202	-1.07883		0.107134	-0.105213		0.300252	0.176224
GALNT10	0.451888	-0.706432		0.856102	-0.446805		0.224535	-0.604515
GALNT4	0.303509	-0.966421		0.616839	0.746296		0.215634	-0.794458
GALNT5	0.764415	-0.243209		0.00339316	1.31397		0.0716361	0.650633
GALNT6	0.164583	-0.423227		0.429951	-1.79338		0.379658	-0.386043
GALNTL5	0.607681	0.0848402		0.285794	0.851332		0.581244	-0.297232
GALNTL6	0.760515	-0.534353		0.350539	0.581273		0.967753	0.140479
GALT	0.0884778	-1.44302		0.41214	0.287521		0.359256	0.300849
GAMT	0.857114	-0.100448		0.524914	0.335337		0.215342	-0.433033
GANAB	0.945562	-0.427856		0.356469	-1.26259		0.542163	-0.490911
GAPDH	0.346413	0.0266121		0.372035	-0.585093		0.560343	-0.334402
GAPDHS	0.196689	1.42383		0.696145	0.271339		0.716276	-0.219224
GARNL3	0.0314492	0.816448		0.988329	-0.971703		0.579353	0.120302
GARS	0.734873	0.451717		0.0230837	0.449336		0.698387	-0.192802
GART	0.0279647	1.72801		0.591127	0.243903		0.375606	0.18328
GAS1	0.216187	-0.699008		0.200759	0.785584		0.797825	-0.340496
GAS2	0.255658	-1.1365		0.353858	-1.50765		0.0406835	-1.20869
GAS2L1	0.811042	-0.273834		0.38003	0.286285		0.680086	-0.363863
GAS2L2	0.516254	-0.000133048		0.705797	-0.00200154		0.985901	0.137076
GAS2L3	0.406874	0.307615		0.245247	-0.595664		0.30469	0.834606
GAS6	0.8337	0.232365		0.154545	-1.44754		0.702186	-0.0737505
GAS7	0.822352	-1.35353		0.726802	0.400289		0.449965	-0.0140006
GAST	0.507372	-0.166282		0.867439	-0.668035		0.569944	0.351906
GATA1	0.0956161	-2.08042		0.137126	0.611511		0.190596	1.17252
GATA3	0.071282	-1.44272		0.517468	0.288097		0.19474	0.363117
GATA4	0.340799	-1.76456		0.780151	-0.432861		0.240106	-0.724607
GATA6	0.348635	0.401656		0.37397	-0.504675		0.798129	0.235538
GATM	0.842926	0.234499		0.299765	0.373779		0.148934	0.238943
GBA	0.531095	-0.921127		0.173468	0.597297		0.663116	-0.577695
GBA3	0.406651	-0.689761		0.0281863	-2.09675		0.36403	-0.227597
GBE1	0.928346	0.614711		0.664426	-1.73165		0.0584203	-0.496549
GBGT1	0.966254	0.400591		0.57299	0.549058		0.647734	0.0557432
GCA	0.753331	0.731902		0.951907	0.592104		0.726316	0.095265
GCAT	0.306106	0.0540284		0.402387	-0.842536		0.0453934	-0.786942
GCDH	0.168547	0.0936688		0.85335	0.388301		0.82443	0.0924324
GCGR	0.073191	1.13196		0.609242	0.549265		0.714804	-0.124497
GCH1	0.841079	0.471109		0.299205	-0.374295		0.85093	-0.0903706
GCK	0.299642	-0.721462		0.642743	0.718226		0.232768	0.49
GCLC	0.0507272	-0.643019		0.88194	-0.868197		0.506707	0.170755
GCLM	0.171873	-1.00583		0.0589012	-1.17625		0.504186	-0.248147
GCNT1	0.378684	0.228097		0.16055	-1.06583		0.27107	-0.453728
GCNT4	0.709524	0.150205		0.0636563	1.51841		0.196133	0.374397
GCSH	0.0331641	-1.13431		0.452289	-2.35007		0.734322	-0.785315
GDA	0.988539	-0.316436		0.447242	-0.787289		0.911285	-0.308953
GDF1	0.426516	0.745027		0.694368	-0.494143		0.573699	0.0682677
GDF15	0.778865	-0.388086		0.054986	1.40514		0.143352	0.22594
GDF6	0.587468	-0.61464		0.0799334	1.11079		0.150495	-0.601852
GDI1	0.607681	-0.90721		0.176304	-1.33271		0.816763	0.25241
GFAP	0.875999	-0.499683		0.407814	-1.77201		0.0700969	-1.08206
GFER	0.0306897	-1.72434		0.801294	1.01815		0.249321	-0.730039
GFI1	0.0980876	-1.16573		0.111662	0.8495		0.223034	0.148392
GFI1B	0.0212425	-0.648064		0.100403	1.55053		0.363043	0.513948
GFOD1	0.599449	-0.87068		0.950645	0.380437		0.570212	0.027988
GFRA1	0.0430774	0.776885		0.328061	-1.43329		0.35229	-0.814526
GFRAL	0.728064	0.416825		0.689933	-0.696904		0.101887	-0.591082
GGCX	0.0955378	0.362981		0.203168	-0.303239		0.970898	-0.200923
GGPS1	0.0867348	-1.11026		0.114168	-1.65743		0.0593714	-0.57672
GGT1	0.0847174	1.35224		0.416494	0.482669		0.318316	-0.552196
GGTLC2	0.850014	-0.366224		0.353858	0.511953		0.299884	0.438881
GH1	0.160204	-0.50838		0.292723	-1.81404		0.706872	0.594484
GH2	0.0159153	-2.57342		0.804496	0.121754		0.243226	-0.199931
GHR	0.367361	-1.79063		0.413014	0.387028		0.785062	-0.224261
GHRH	0.522101	0.586332		0.0114021	-2.66347		0.327726	-0.831705
GHRHR	0.305734	1.21408		0.342125	0.458188		0.659685	-0.196887
GIGYF1	0.458302	-0.469579		0.867124	-1.43154		0.495914	-0.0965503
GINS1	0.00192114	-1.69062		0.987305	-0.0377351		0.324701	-0.461055
GINS2	0.912612	-1.79298		0.757051	-0.457202		0.287209	-0.374546
GINS4	0.00956035	-2.26947		0.0887454	-1.10235		0.179319	-0.949855
GIT1	0.201647	0.447859		0.373539	-1.05522		0.837657	-0.0500267
GIT2	0.71011	-0.852227		0.546824	-0.429487		0.215634	-0.782495
GJA1	0.547217	-0.352824		0.154081	0.975241		0.959266	0.00525306
GK	0.315879	1.63959		0.666464	-0.602886		0.795694	0.146781
GK2	0.417191	-0.931965		0.126516	1.58094		0.482044	0.15936
GK5	0.75692	-0.135327		0.751097	0.57674		0.146068	0.574954
GKAP1	0.0670062	1.11771		0.830219	-0.0585261		0.271254	0.281821
GLA	0.285389	0.311526		0.663262	-1.39656		0.174927	-0.292985
GLCCI1	0.0228637	-0.241686		0.811818	-1.65593		0.0775404	-0.782353
GLDC	0.850322	-0.553378		0.852025	-0.698551		0.666841	-0.296608
GLG1	0.547479	0.709459		0.807032	-0.481936		0.569141	0.331722
GLI1	0.64392	-0.778342		0.870594	-0.507613		0.512785	-0.0264779
GLI3	0.832164	-0.104801		0.377426	-1.35633		0.453283	0.225695
GLIPR2	0.0895129	-1.90857		0.798738	0.38573		0.683848	-0.0323694
GLO1	0.20318	-0.432275		0.366267	0.32888		0.500417	-0.158442
GLP1R	0.666085	0.276082		0.800831	-0.38819		0.284882	-0.300618
GLP2R	0.96249	-0.39679		0.959888	-0.489213		0.530208	-0.322967
GLRA1	0.324693	-1.3029		0.568633	-0.430953		0.0665134	-0.960491
GLRA2	0.397571	-0.494953		0.187766	-2.0034		0.0953156	-0.390945
GLRA3	0.926157	-0.966172		0.196864	0.330635		0.101474	0.239674
GLRB	0.568906	-0.98217		0.131191	0.84961		0.418677	-0.204446
GLRX	0.0203439	-2.35772		0.0863465	0.958714		0.0471512	0.994458
GLRX2	0.0203101	-0.753395		0.489508	0.332109		0.134903	0.374898
GLRX3	0.940551	0.409643		0.253815	-1.39295		0.931013	-0.130324
GLS	0.736356	-0.453176		0.553243	0.543994		0.559546	0.393307
GLS2	0.830629	0.0155564		0.144917	-0.925829		0.92036	0.141569
GLT1D1	0.111626	0.306958		0.561318	-1.45607		0.580973	-0.269717
GLT6D1	0.43226	1.58967		0.000941053	1.8288		0.001934	0.716449
GLTP	0.400008	-0.980406		0.7269	-0.0603187		0.408763	-0.265834
GLTSCR1	0.62792	-1.01325		0.728404	-1.18516		0.663116	-0.560319
GLUD1	0.799771	-1.85175		0.81729	-1.48009		0.724836	-0.406153
GLUD2	0.871968	-0.268861		0.797735	-1.26634		0.298966	0.459335
GLUL	0.0482122	-0.772223		0.129562	-1.75587		0.0919924	-0.616351
GLYAT	0.700755	0.294331		0.492153	0.320731		0.361949	0.426985
GLYATL1	0.311254	1.58362		0.606678	-0.210172		0.57584	-0.263582
GLYATL2	0.101305	1.52446		0.191276	-1.19802		0.448685	0.248181
GM2A	0.0793876	0.798264		0.931816	-0.431993		0.194094	-0.516846
GMDS	0.561985	0.281708		0.907957	-0.488249		0.16427	0.444091
GML	0.792482	-0.258312		0.976821	-0.230725		0.842899	0.0704191
GMNN	0.830629	0.487034		0.935959	0.537862		0.854642	-0.173648
GMPR	0.636601	0.294772		0.502441	0.416339		0.55822	0.472951
GMPR2	0.310591	1.66836		0.252816	-0.310388		0.432653	-0.222716
GMPS	0.0144722	-1.34379		0.623313	-0.241005		0.783547	0.201364
GNA12	0.746467	-0.106966		0.967815	-0.640556		0.648017	-0.206725
GNAI1	0.961235	0.0768788		0.469341	-0.701752		0.938854	-0.175388
GNAS	0.811918	-0.244316		0.878274	0.476633		0.705298	0.00640206
GNAT1	0.145083	-0.727747		0.738059	0.0466262		0.931326	-0.289449
GNB1	0.190619	-1.53373		0.73685	-1.43081		0.296769	0.34261
GNB2	0.40443	-0.125331		0.319813	0.944327		0.602012	0.354966
GNB5	0.201925	0.776893		0.098435	1.05389		0.459005	0.119941
GNE	0.705719	-1.31306		0.0598302	1.25155		0.216366	-0.107702
GNG10	0.355805	-1.12467		0.135017	0.493193		0.793192	-0.11835
GNG11	0.523381	0.840493		0.667339	-0.198674		0.406976	-0.342853
GNG2	0.0885663	0.271513		0.0417238	-1.17807		0.141601	0.42357
GNG3	0.860514	-0.621438		0.470819	-0.614191		0.113798	0.705979
GNG7	0.403321	-2.46787		0.120783	1.30629		0.575556	0.285224
GNG8	0.408434	-1.44503		0.746237	-0.616551		0.518305	-0.293025
GNGT1	0.0402955	1.62454		0.338495	0.475914		0.323069	-0.627025
GNL1	0.676703	-0.491253		0.917492	-0.559351		0.18387	-0.344637
GNLY	0.969078	0.376805		0.242168	-1.33684		0.377949	-0.0196296
GNMT	0.864757	-0.230694		0.306664	0.662403		0.365681	-0.100983
GNPDA1	0.327507	0.585731		0.0333071	-1.47257		0.0416242	-0.880879
GNPDA2	0.0832359	1.20262		0.798664	-0.281168		0.221689	0.563004
GNRH1	0.0139493	-0.725857		0.0494058	-2.81633		0.657687	0.341399
GNRH2	0.379704	-0.693185		0.0595486	-0.348227		0.0571717	-0.194958
GNRHR	0.0386855	0.208248		0.479989	-1.71693		0.458287	-0.517591
GOLGA5	0.743489	1.07018		0.935959	-0.870537		0.372004	0.09832
GOPC	0.422635	-0.547669		0.756577	-0.119123		0.204306	0.153573
GOT1	0.792482	-0.332161		0.344574	-0.37259		0.51431	0.292419
GOT2	0.493857	-1.02222		0.974584	-0.665992		0.822896	0.0989562
GP1BA	0.00968148	-1.55354		0.0140184	0.402967		0.28364	-0.242427
GP9	0.491128	0.904902		0.0857581	-1.46783		0.0603897	-0.218045
GPC3	0.52929	-0.846749		0.623313	-0.413295		0.253624	-0.342746
GPD1	0.139098	-1.8013		0.264584	-0.933308		0.666554	0.246281
GPHN	0.538086	0.657569		0.705947	-0.839228		0.712156	0.0874618
GPI	0.743489	-0.711072		0.886079	0.268063		0.207701	0.737441
GPLD1	0.0262179	1.82615		0.368823	0.116171		0.573699	-0.382556
GPR112	0.0329697	1.38592		0.0446057	0.389618		0.335401	-0.252119
GPR132	0.333076	-3.23988		0.820349	-0.136876		0.710556	0.241424
GPR158	0.349648	-1.70404		0.758711	-1.96421		0.509235	-0.216191
GPR18	0.329745	-2.01679		0.31097	-1.31029		0.250196	-0.108021
GPRASP1	0.448144	-0.484633		0.711911	0.434134		0.458442	0.247346
GPRC5A	0.504352	-0.0145504		0.221222	-0.838995		0.884134	0.317685
GPS1	0.100572	-1.08001		0.74844	-0.279014		0.913787	0.168091
GPS2	0.331836	-0.65511		0.140053	0.808045		0.0791303	0.458432
GPT	0.761114	-1.22834		0.450114	0.409657		0.191533	0.643782
GPT2	0.488407	-1.02554		0.931498	-1.05377		0.901284	0.00927465
GPX1	0.291466	-0.436592		0.884497	-0.269791		0.122235	0.530204
GPX2	0.254484	0.0140352		0.00535931	2.59761		0.0689454	0.523299
GPX3	0.477604	-0.730976		0.949353	-0.494141		0.944503	0.156681
GPX4	0.317781	-0.627505		0.389786	0.11587		0.91629	-0.203961
GPX5	0.15695	1.63077		0.95446	-0.658545		0.641792	-0.238889
GPX6	0.61818	-0.462294		0.0375175	-0.007804		0.314265	-1.13859
GPX7	0.164344	-0.326639		0.738966	0.187128		0.306739	0.0990885
GPX8	0.0668084	-1.82095		0.583675	-1.14214		0.728685	-0.421882
GRAP2	0.515471	-0.684477		0.650515	0.794328		0.198325	0.520041
GRB10	0.0783817	1.03601		0.369464	-0.125439		0.2369	-0.713229
GRB2	0.391469	0.506981		0.350953	1.2731		0.419358	0.153633
GREM2	0.316449	-0.063121		0.472052	0.261905		0.160358	0.398267
GRHPR	0.469105	-0.511315		0.230746	-1.38043		0.575581	-0.334907
[truncated: 7,357 more rows]
